# Supplementary material for: Thiophene-based organic dye with large Stokes shift and deep red emission for live cell NAD(P)H detection under varying chemical stimuli
Source: Royal Society of Chemistry journal article supplement (doi:10.1039/d3tb00645j), 2023-01-01
Supplement: d3tb00645j1.pdf [file d3tb00645j1.pdf]

## Supporting Information

### **Thiophene-Based Organic Dye with Large Stokes Shift and Deep Red Emission for Live Cell NAD(P)H Detection under Varying Chemical Stimuli**

Sushil K. Dwivedi,<sup>a,b</sup> Dilka Liyana Arachchige,<sup>a,b</sup> Adenike Olowolagba,<sup>a,b</sup> Mohamed Mahmoud,<sup>a,b</sup> Jenna Cunnien,<sup>a,b</sup> Daniel R. Tucker,<sup>a</sup> Delaney Fritz,<sup>c</sup> Thomas Werner,<sup>c</sup> Rudy L Luck<sup>a\*</sup> and Haiying Liu<sup>a\*</sup>

<sup>a</sup>Department of Chemistry, <sup>b</sup>Health Research Institute, <sup>c</sup>Department of Biological Sciences, Michigan Technological University, Houghton, MI 49931. E-mail: rluck@mtu.edu and hylu@mtu.edu

## Table of Contents

|                                                                                                                                                      |            |
|------------------------------------------------------------------------------------------------------------------------------------------------------|------------|
| <b>Scheme 1:</b> Synthetic approach to prepare fluorescent probes.....                                                                               | <b>S5</b>  |
| <b>Scheme 2:</b> Chemical structures of a reported fluorescent probe in response to NADH.....                                                        | <b>S23</b> |
| <b>Figure S1:</b> <sup>1</sup> H NMR spectrum of compound <b>3</b> in DMSO- <i>d</i> <sub>6</sub> solution.....                                      | <b>S10</b> |
| <b>Figure S2:</b> <sup>1</sup> H NMR spectrum of Probe <b>A</b> in DMSO- <i>d</i> <sub>6</sub> solution. ....                                        | <b>S11</b> |
| <b>Figure S3:</b> <sup>13</sup> C NMR spectrum of Probe <b>A</b> in DMSO- <i>d</i> <sub>6</sub> solution.....                                        | <b>S12</b> |
| <b>Figure S4:</b> Electrospray MS spectrum of probe <b>A</b> .....                                                                                   | <b>S13</b> |
| <b>Figure S5:</b> Electrospray MS spectrum of Probe <b>AH</b> .....                                                                                  | <b>S14</b> |
| <b>Figure S6:</b> <sup>1</sup> H NMR spectrum of compound <b>5</b> in CDCl <sub>3</sub> solution.....                                                | <b>S15</b> |
| <b>Figure S7:</b> <sup>1</sup> H NMR spectrum of Probe <b>B</b> in DMSO- <i>d</i> <sub>6</sub> solution. ....                                        | <b>S16</b> |
| <b>Figure S8:</b> <sup>13</sup> C NMR spectrum of Probe <b>B</b> in DMSO- <i>d</i> <sub>6</sub> solution.....                                        | <b>S17</b> |
| <b>Figure S9:</b> Electrospray MS spectrum of probe <b>B</b> .....                                                                                   | <b>S18</b> |
| <b>Figure S10:</b> Electrospray MS spectrum of Probe <b>BH</b> .....                                                                                 | <b>S19</b> |
| <b>Figure S11:</b> Fluorescence intensity changes of Probe <b>A</b> and Probe <b>B</b> (5 μM) with different concentration of NADH (0-50 μM).. ..    | <b>S20</b> |
| <b>Figure S12:</b> The fluorescence response of Probe <b>A</b> at a concentration of 5 μM to various species at 0.1 mM was measured. ....            | <b>S20</b> |
| <b>Figure S13:</b> The fluorescence response of Probe <b>B</b> at a concentration of 5 μM to various species at 0.1 mM was measured .....            | <b>S21</b> |
| <b>Figure S14:</b> The fluorescence responses of Probes <b>A</b> and <b>B</b> in the absence and presence of 0.1 M NADH in different pH buffers..... | <b>S21</b> |
| <b>Figure S15:</b> MTT assay of A549 cells incubated with Probes <b>A</b> (left) and <b>B</b> (right) with different concentrations.....             | <b>S22</b> |
| <b>Figure S16:</b> Photostability of Probe <b>A</b> and Probe <b>B</b> (5 μM) in the presence of NADH (100 μM).....                                  | <b>S22</b> |

|                                                                                                                                                                                                                                                                                                                                                                                                                                                                                                    |            |
|----------------------------------------------------------------------------------------------------------------------------------------------------------------------------------------------------------------------------------------------------------------------------------------------------------------------------------------------------------------------------------------------------------------------------------------------------------------------------------------------------|------------|
| <b>Figure S17.</b> Absorption and fluorescence spectra of 20 $\mu\text{M}$ fluorescent probe (reported in ACS Sensors 2016, 6, 702-709) in pH 7.4 PBS buffer containing 5% DMSO solution in the absence and presence of different NADH concentrations under 537 nm excitation.....                                                                                                                                                                                                                 | <b>S23</b> |
| <b>Figure S18.</b> Fluorescence spectra of 20 $\mu\text{M}$ fluorescent probe (reported in ACS Sensors 2016, 6, 702-709) in pH 7.4 PBS buffer containing 5% DMSO solution in the absence and presence of different NADH concentrations under 537 nm excitation.....                                                                                                                                                                                                                                | <b>S24</b> |
| <b>Figure S19.</b> Fluorescence images of A459 cells pre-treated with various concentrations of gemcitabine in glucose-deficient DMEM medium for two hours, followed by incubation with 5 $\mu\text{M}$ Probe <b>A</b> in cell medium for 30 minutes. The cellular fluorescence was acquired using a 488 nm excitation and emission was collected within the range of 575-675 nm. The scale bars represent 50 $\mu\text{m}$ .....                                                                  | <b>S25</b> |
| <b>Figure S20.</b> Fluorescence images of A459 cells treated with different concentrations of gemcitabine in glucose-deficient DMEM medium for two hours, followed by incubation with 5 $\mu\text{M}$ of a fluorescent probe (previously reported in ACS Sensors, 2016, 6(1), 702-709) in serum-free DMEM medium for 30 minutes. The cells were excited at 488 nm and the emitted fluorescence was collected between 500-600 nm. The scale bars in the images correspond to 50 $\mu\text{m}$ ..... | <b>S26</b> |
| <b>Figure S21:</b> GaussView representation of probe <b>A</b> optimized geometry.....                                                                                                                                                                                                                                                                                                                                                                                                              | <b>S27</b> |
| <b>Figure S22:</b> Calculated UV-Vis spectrum for Probe <b>A</b> in water.....                                                                                                                                                                                                                                                                                                                                                                                                                     | <b>S27</b> |
| <b>Figure S23:</b> Drawing of selected molecular orbitals listed in Table S1.....                                                                                                                                                                                                                                                                                                                                                                                                                  | <b>S29</b> |
| <b>Figure S24:</b> GaussView representation of Probe <b>AH</b> optimized geometry.....                                                                                                                                                                                                                                                                                                                                                                                                             | <b>S30</b> |
| <b>Figure S25:</b> Calculated UV-Vis spectrum for Probe <b>AH</b> in water.....                                                                                                                                                                                                                                                                                                                                                                                                                    | <b>S30</b> |
| <b>Figure S26:</b> Drawings of selected molecular orbitals listed in Table S2.....                                                                                                                                                                                                                                                                                                                                                                                                                 | <b>S32</b> |
| <b>Figure S27:</b> GaussView representation of Probe <b>B</b> optimized geometry.....                                                                                                                                                                                                                                                                                                                                                                                                              | <b>S33</b> |
| <b>Figure S28:</b> Calculated UV-Vis spectrum for Probe <b>B</b> .....                                                                                                                                                                                                                                                                                                                                                                                                                             | <b>S33</b> |
| <b>Figure S29:</b> Drawings of selected molecular orbitals listed in Table S3.....                                                                                                                                                                                                                                                                                                                                                                                                                 | <b>S36</b> |
| <b>Figure S30:</b> GaussView representation of Probe <b>BH</b> optimized geometry.....                                                                                                                                                                                                                                                                                                                                                                                                             | <b>S37</b> |
| <b>Figure S31:</b> Calculated UV-Vis spectrum for Probe <b>BH</b> in water.....                                                                                                                                                                                                                                                                                                                                                                                                                    | <b>S37</b> |
| <b>Figure S32:</b> Drawings of selected molecular orbitals listed in Table S4.....                                                                                                                                                                                                                                                                                                                                                                                                                 | <b>S40</b> |
| <b>Table S1:</b> Calculated atomic coordinated for Probe <b>A</b> in water.....                                                                                                                                                                                                                                                                                                                                                                                                                    | <b>S26</b> |

|                                                                                                          |            |
|----------------------------------------------------------------------------------------------------------|------------|
| <b>Table S2:</b> Excitation energies and oscillator strengths listing for Probe <b>A</b> in water.....   | <b>S27</b> |
| <b>Table S3:</b> Calculated atomic coordinated for Probe <b>AH</b> in water.....                         | <b>S29</b> |
| <b>Table S4:</b> Excitation energies and oscillator strengths listed for Probe <b>AH</b> . .....         | <b>S30</b> |
| <b>Table S5:</b> Calculated atomic coordinated for Probe <b>B</b> in water.....                          | <b>S33</b> |
| <b>Table S6:</b> Excitation energies and oscillator strengths for Probe <b>B</b> in water.....           | <b>S34</b> |
| <b>Table S7:</b> Calculated atomic coordinated of Probe <b>BH</b> in water.....                          | <b>S37</b> |
| <b>Table S8:</b> Excitation energies and oscillator strengths listing for Probe <b>BH</b> in water. .... | <b>S38</b> |

## Synthesis of fluorescent probes

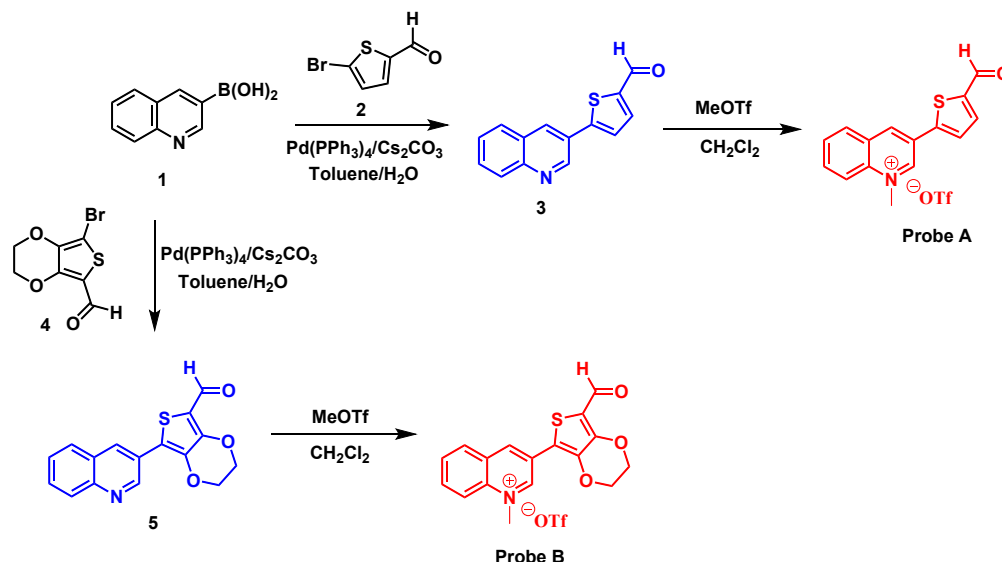

**Scheme 1.** Synthetic approach to prepare fluorescent probes.

**Synthesis of compound 3:** In a 50 mL round bottom flask, 500.0 mg (2.89 mmol) of quinolin-3-ylboronic acid and 552.20 mg (2.89 mmol) of 5-bromothiophene-2-carbaldehyde were combined with 20 mL of a toluene/H<sub>2</sub>O mixture (9:1) under a nitrogen atmosphere. A small amount of palladium tetrakis(triphenylphosphine) (5% by mol) and 2.5 equivalents of cesium carbonate were then added to the mixture, and the reaction was heated at 90°C for 8 hours. The reaction was confirmed complete by TLC, and the reaction mixture was cooled before the solvent was removed under reduced pressure. The residue was treated with ice-cold water and extracted using dichloromethane (3 extractions, 20 mL). The combined organic layer was dried with sodium bicarbonate and evaporated under reduced pressure to yield a light-yellow solid. Purification by column chromatography produced a compound **3** with a 60% yield. <sup>1</sup>H NMR (400 MHz, DMSO-*d*<sub>6</sub>), δ (ppm): 7.76 (1H, m), 7.82 (1H, m), 8.03 (1H, d, *J* = 12.0 Hz), 8.08 (2H, d, *J* = 8 Hz), 8.14 (1H, d, *J* = 4.0 Hz), 8.82 (1H, s), 9.37 (1H, s), 9.98 (1H, s).

**Synthesis of Probe A:** A solution of compound **3** (100.0 mg, 0.41 mmol) in 20 mL of dry dichloromethane was prepared and methyl trifluoromethanesulfonate (75.5 mg, 0.45 mmol) was added to the mixture. The reaction mixture was stirred at room temperature under a nitrogen

atmosphere for 6 hours, which led to the formation of a light-yellow precipitate, yielding Probe **B**. The precipitate was filtered and washed with cold dichloromethane (3 times, 5 mL each). <sup>1</sup>H NMR (400 MHz, DMSO-*d*<sub>6</sub>), δ (ppm): 4.71 (3H, s), 8.09 (2H, m), 8.23 (1H, d, *J* = 4.0 Hz), 8.29 (1H, t, *J* = 6.0 Hz), 8.49 (2H, m), 9.68 (1H, s), 10.04 (1H, s), 10.09 (1H, s). <sup>13</sup>C NMR (101 MHz, DMSO-*d*<sub>6</sub>), δ (ppm): 46.04, 119.74, 127.26, 129.26, 129.56, 131.17, 131.27, 136.33, 138.07, 139.31, 142.58, 145.13, 145.21, 149.04, 185.13. LCMS (m/z): 254.17

**Synthesis of compound 5:** In a 50 mL round-bottomed flask, a mixture of quinolin-3-ylboronic acid (500.0 mg, 2.89 mmol) and 7-bromo-2,3-dihydrothieno[3,4-*b*][1,4]dioxine-5-carbaldehyde (719.84 mg, 2.89 mmol) was prepared using 20 mL of a 9:1 mixture of toluene and water. Under a nitrogen atmosphere, a small quantity of palladium tetrakis(triphenylphosphene) (5 mol%) and cesium carbonate (2.5 equiv.) were added to the mixture, which was then heated at 90°C for 8 hours. Completion of the reaction was confirmed by TLC, following which the reaction mixture was cooled and the solvent was removed under reduced pressure. The residue was treated with ice-cold water and extracted three times with dichloromethane. The combined organic layer was dried over sodium bicarbonate and evaporated under reduced pressure, resulting in a crude light-yellow solid. Purification of the crude product by column chromatography yielded compound **5** as a yellow solid, with a yield of 65%. <sup>1</sup>H NMR (400 MHz, CDCl<sub>3</sub>), δ (ppm): 4.49 (4H, s), 7.58 (1H, t, 8.0 Hz), 7.74 (1H, t, *J* = 6.0 Hz), 7.78 (2H, d, *J* = 8 Hz), 8.11 (1H, d, *J* = 8.0 Hz), 8.54 (1H, s), 9.32 (1H, s), 10.0 (1H, s).

**Synthesis of Probe B:** To dissolve compound **5** (100.0 mg, 0.33 mmol), 20 mL of dry dichloromethane was employed, and subsequently, 60.71 mg (0.36 mmol) of methyl trifluoromethanesulfonate was added to the mixture. The resulting mixture was stirred at room temperature for 6 hours under a nitrogen-filled atmosphere, leading to the formation of a yellow precipitate. The precipitate was then filtered and washed with cold dichloromethane for 5 cycles, yielding Probe **B**. <sup>1</sup>H NMR (400 MHz, DMSO-*d*<sub>6</sub>), δ (ppm): 4.60 (4H, s), 4.72 (3H, s), 8.07 (1H, m), 8.29 (1H, m), 8.51 (1H, m), 8.55 (2H, d, *J* = 4.0 Hz), 9.55 (1H, s), 9.81 (1H, s), 10.01 (1H, s). <sup>13</sup>C NMR (101 MHz, DMSO-*d*<sub>6</sub>), δ (ppm): 46.26, 65.82, 65.96, 117.92, 118.37, 119.74, 126.20, 129.55, 131.12, 131.19, 136.21, 137.79, 141.56, 142.39, 148.49, 149.33, 180.67. LCMS (m/z): 312.11.

## Instrumentation

The  $^1\text{H}$  (500 MHz) and  $^{13}\text{C}$  (125 MHz) NMR spectra were acquired using a Bruker NMR spectrometer (Ascend 500) in  $\text{DMSO-d}_6$  and  $\text{CDCl}_3$  ( $2.0 \times 10^{-2}$  M). The absorption and emission spectra of the probe were measured using a PerkinElmer Lambda 35 UV/vis spectrometer and a Jobin Yvon Fluoromax-4 spectrofluorometer, respectively. The mass spectra of the probe and its reduced product were recorded using a Thermo scientific LCQ Fleet mass spectrometry. Confocal images were captured using an OLYMPUS FLUOVIEW FV1000. Stock solutions of probe **A**, probe **B**, NADH, NADPH, and other analytes were prepared in pH 7.4 phosphate-buffered saline.

## Reagents

The experiment utilized a variety of reagents including metal ions, cysteine, glutathione, carbohydrates, amino acids, and other chemicals. These reagents were purchased from commercial vendors and used in their original form. Additionally, cyanine dye (IR-780) was also utilized in the experiment.

## Cell culture

All experiments were performed by exposing A549 cells to 5  $\mu\text{M}$  of either probe **A** or **B** for 1 hour. In the NADH-dependent study, the A549 cells were first incubated with various concentrations of NADH (20, 50, 100  $\mu\text{M}$ ) in DMEM medium for 1 hour, followed by treatment with 5  $\mu\text{M}$  of probe **A** or **B** for an additional hour. In the glucose-dependent study, A549 cells were pre-treated with 0, 5, 10, and 20 mM of glucose in serum-free DMEM medium for 1 hour before exposure to 5  $\mu\text{M}$  of probe **A** or **B** for 1 hour. The pyruvate/lactate-dependent studies involved pre-treating A549 cells with 10 mM lactate, 5 mM pyruvate, or a combination of 10 mM lactate and 5 mM pyruvate for 1 hour in serum-free DMEM medium before exposure to 5  $\mu\text{M}$  of probe **A** or **B** in serum-free DMEM medium for 1 hour.

For investigating the influence of FCCP, the A549 cells were initially exposed to 5  $\mu\text{M}$  FCCP for 15 minutes in serum-free DMEM medium, followed by treatment with either probe **A** or **B** for 1 hour.

### **Colocalization Study**

To perform the colocalization analysis, A549 cells were initially treated with 50 mM glucose in serum-free DMEM medium for 30 minutes. Following this, the cells were exposed to a mixture of 5  $\mu$ M of probe **A** or **B** and a cyanine dye (IR-780) in serum-free DMEM medium for 60 minutes.

### **Hypoxia experiment**

In order to study the NADH levels under hypoxic conditions, we subjected A549 cells to pre-treatment with different concentrations of CoCl<sub>2</sub> (50, 100, and 150  $\mu$ M) for a duration of 12 hours. Subsequently, the cells were incubated with either 5  $\mu$ M of probe **A** or **B** in serum-free and glucose-free DMEM medium for a period of 60 minutes to assess their impact.

### **Drug treatment of A459 cells**

The impact of cisplatin on NAD(P)H levels in A549 cells was investigated by treating the cells with 20  $\mu$ M cisplatin in DMEM medium without serum and glucose for 6 and 24 hours. Subsequently, the cells were incubated with either 5  $\mu$ M probe A or B in serum-free and glucose-free DMEM medium for 60 minutes to determine its effect.

To investigate how gemcitabine affects NAD(P)H levels in A549 cells, the cells were treated with different concentrations of gemcitabine (5  $\mu$ M, 10  $\mu$ M, and 20  $\mu$ M) in DMEM medium without serum for two hours. Subsequently, we incubated the cells with either 5  $\mu$ M of probe A or 5  $\mu$ M of a previously reported fluorescent probe (ACS Sensor 2016, 1(6), 702-709) in serum-free and glucose-free DMEM medium for 30 minutes to analyze the impact. We chose the same 30-minute incubation time for both probes to ensure fair comparison.

### ***D. melanogaster* larval imaging**

The wild-type *D. melanogaster* fly stock Canton-S was utilized. Female flies were given the opportunity to deposit their eggs on agar plates supplemented with sucrose and Baker's yeast. After an 8-hour incubation period, the eggs were collected, and the yeast was removed to prepare for the hatching of the larvae. Once hatched, the larvae were gathered using a pin and thoroughly rinsed twice with 1 mL of PBS. The larvae were then subjected to a 6-hour incubation



with 5  $\mu$ M probe **A** or **B** in pH 7.4 phosphate buffer solutions. To complete the process, the larvae were washed three times for 10 minutes each with PBS and placed on a glass slide beneath a coverslip for fluorescence imaging under 488 nm excitation.

*D. melanogaster* flies were allowed to lay eggs on sugar agar plates with Baker's yeast and were kept at room temperature with a 12:12-h light/dark cycle. The eggs were collected in the early morning and late afternoon using a moist brush and were subsequently washed and placed on Petri dishes on top of damp paper towels. After two days of incubation at 18°C, the larvae hatched and were transferred to glass viewing dishes for staining experiments. Any larvae that died of starvation during the experiment were removed during washes. The larvae hatched from starvation were incubated in different NADH concentrations, ranging from 0 to 100  $\mu$ M in aqueous solutions, and then washed three times with aqueous solutions before being further incubated with 5  $\mu$ M probe **A** in PBS solution for one hour. After being washed three times with PBS for 10 minutes each time, the larvae were mounted on a glass slide with a coverslip for fluorescence imaging using 488 nm excitation.

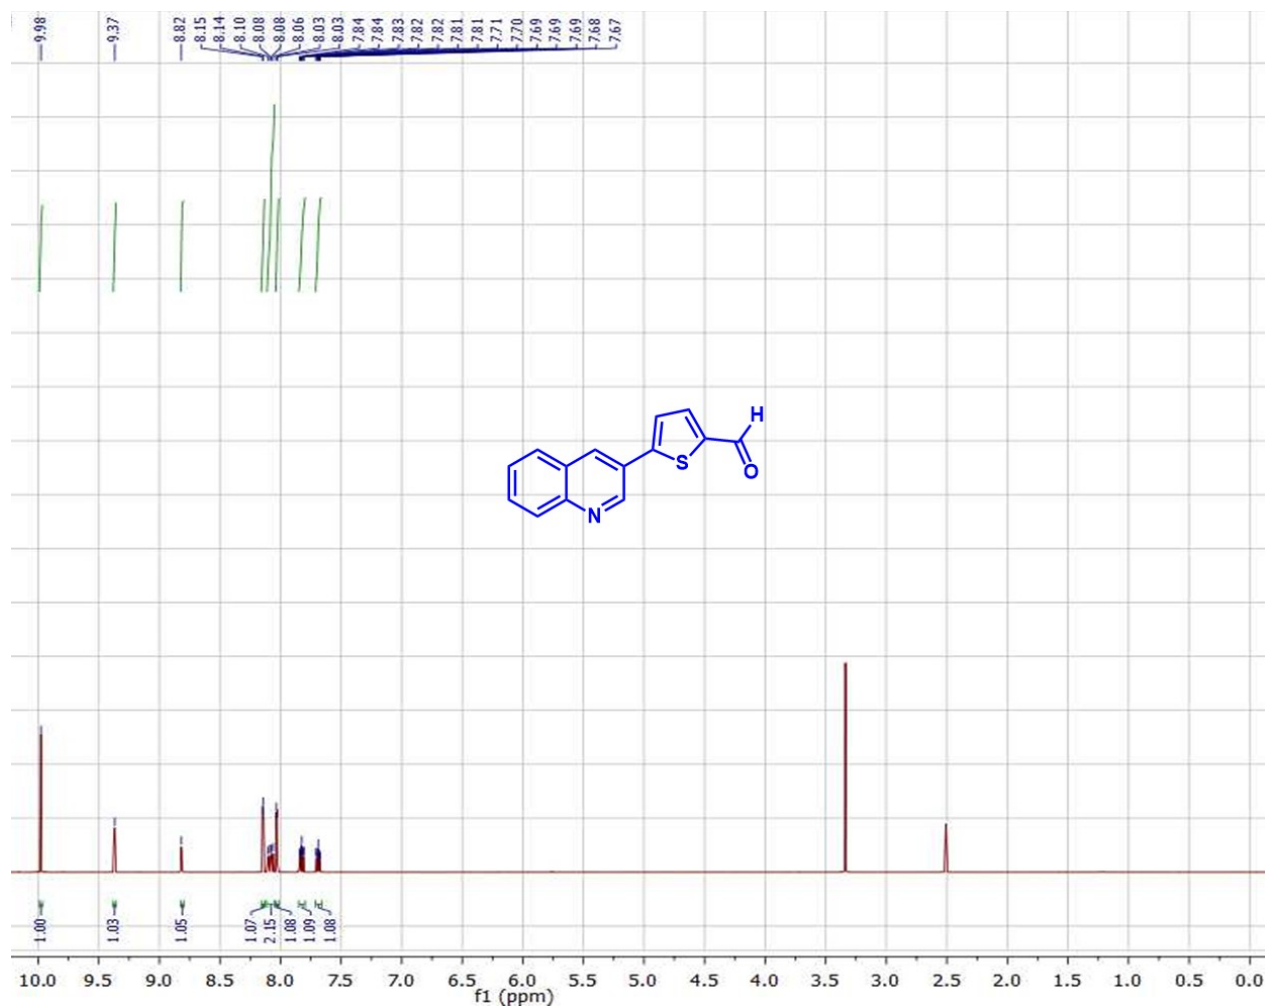

**Figure S1:**  $^1\text{H}$  NMR spectrum of compound **3** in  $\text{DMSO-}d_6$  solution.

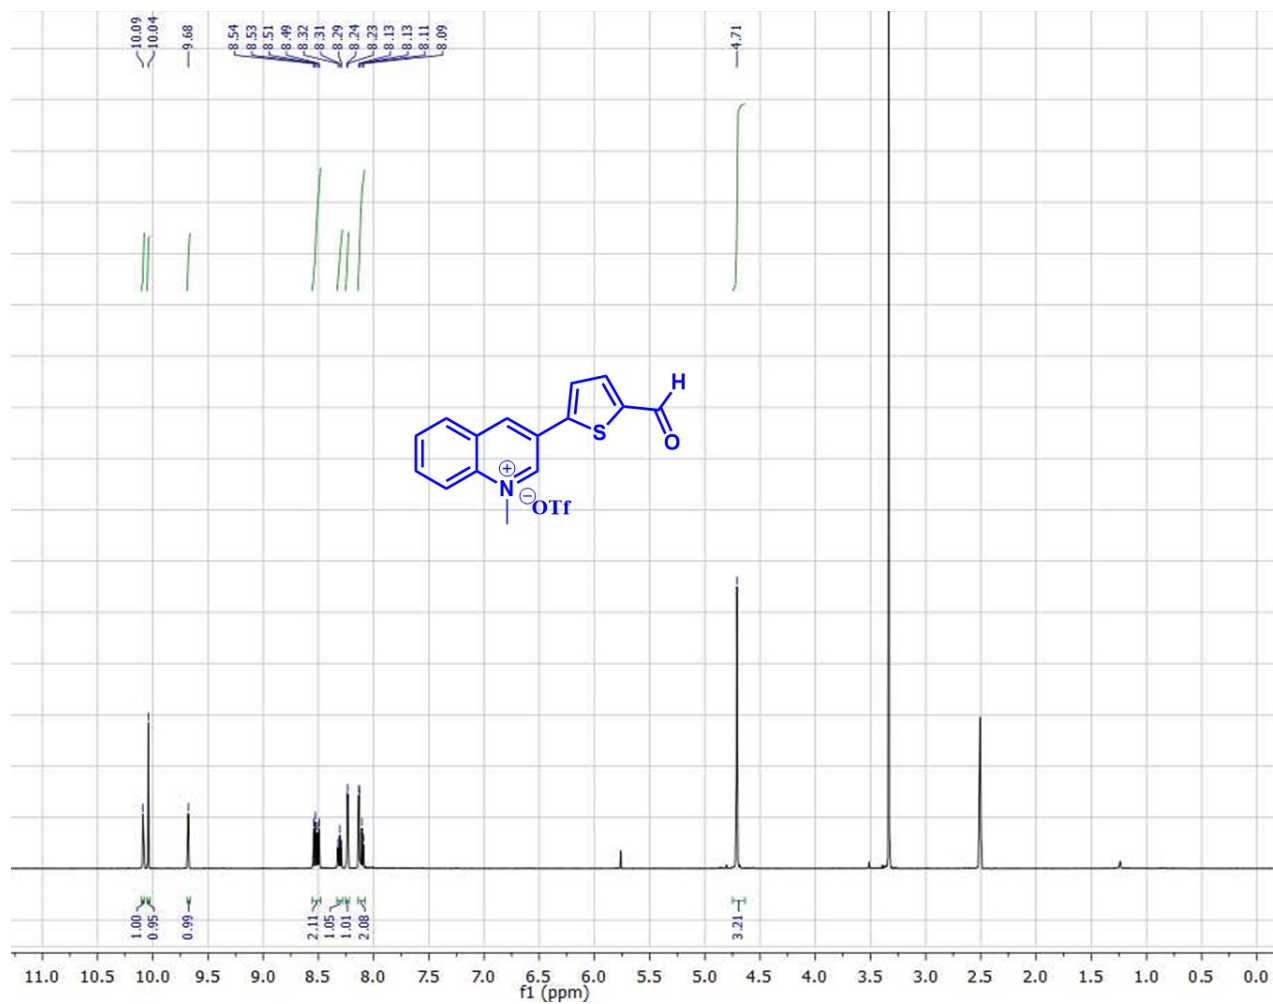

**Figure S2:**  $^1\text{H}$  NMR spectrum of Probe A in  $\text{DMSO-}d_6$  solution.

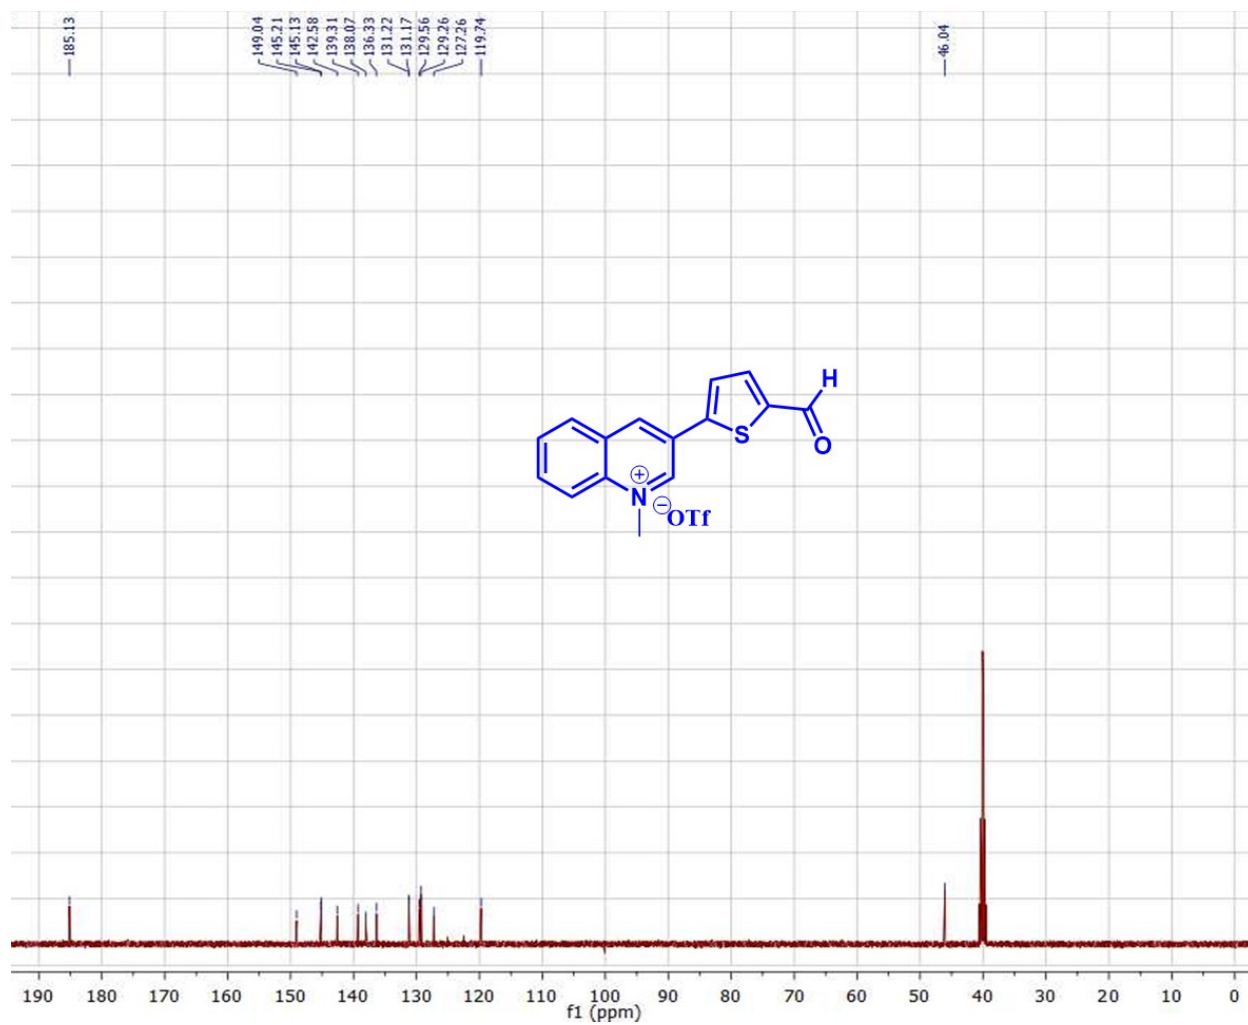

**Figure S3:**  $^{13}\text{C}$  NMR spectrum of Probe A in  $\text{DMSO-}d_6$  solution.

#11056 IT: 10.000 ST: 0.58 uS: 5 NL: 5.08E2  
F: ITMS + c ESI Full m s [150.00-500.00]

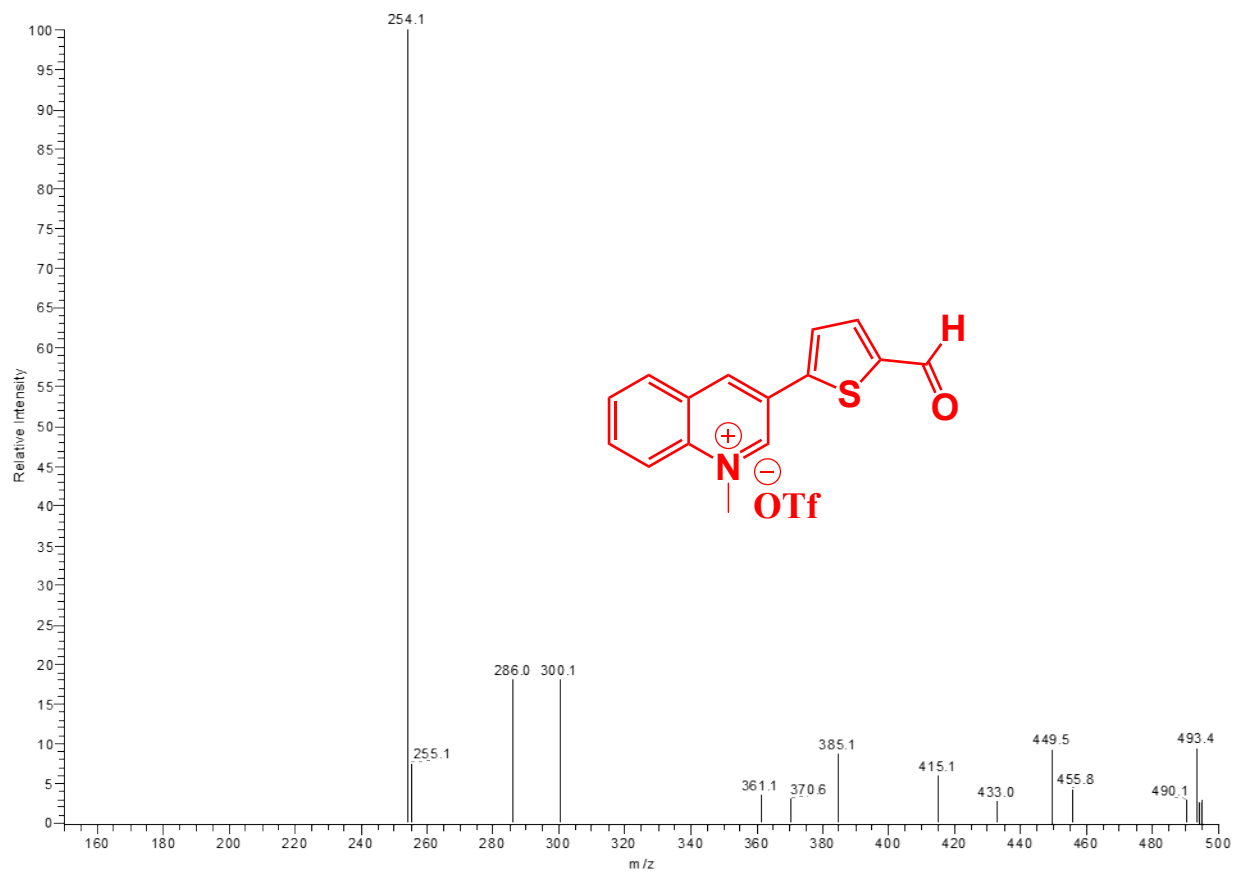

Figure S4: Electrospray MS spectrum of Probe A.

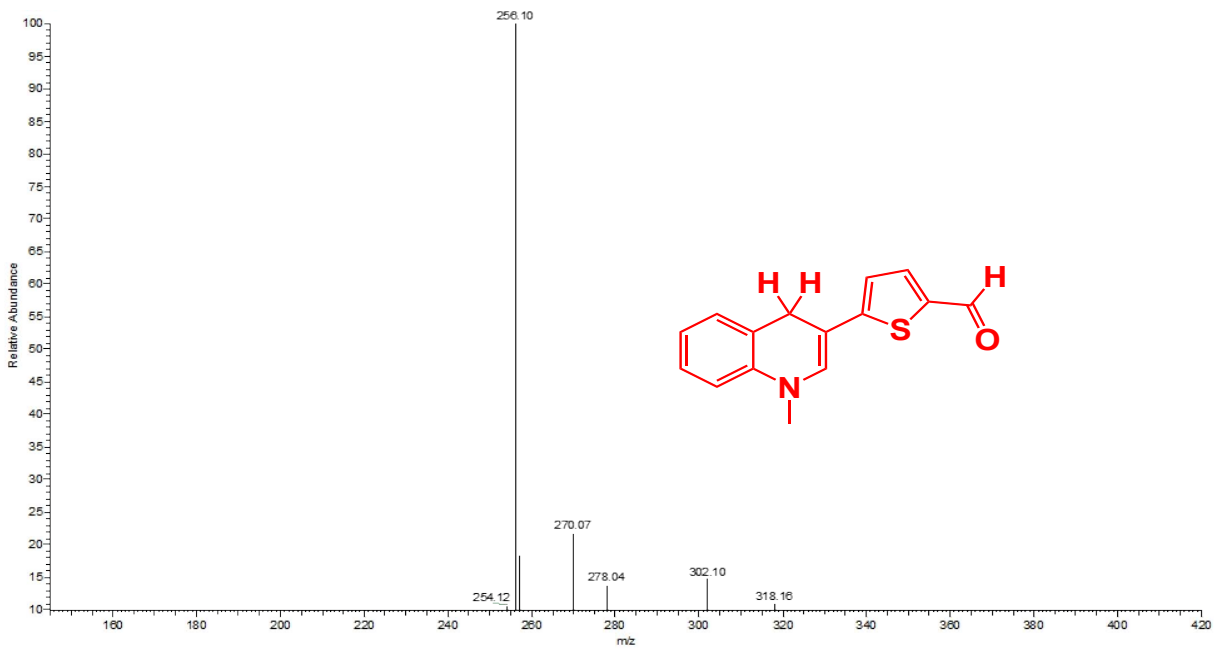

**Figure S5:** Electrospray MS spectrum of Probe **AH**.

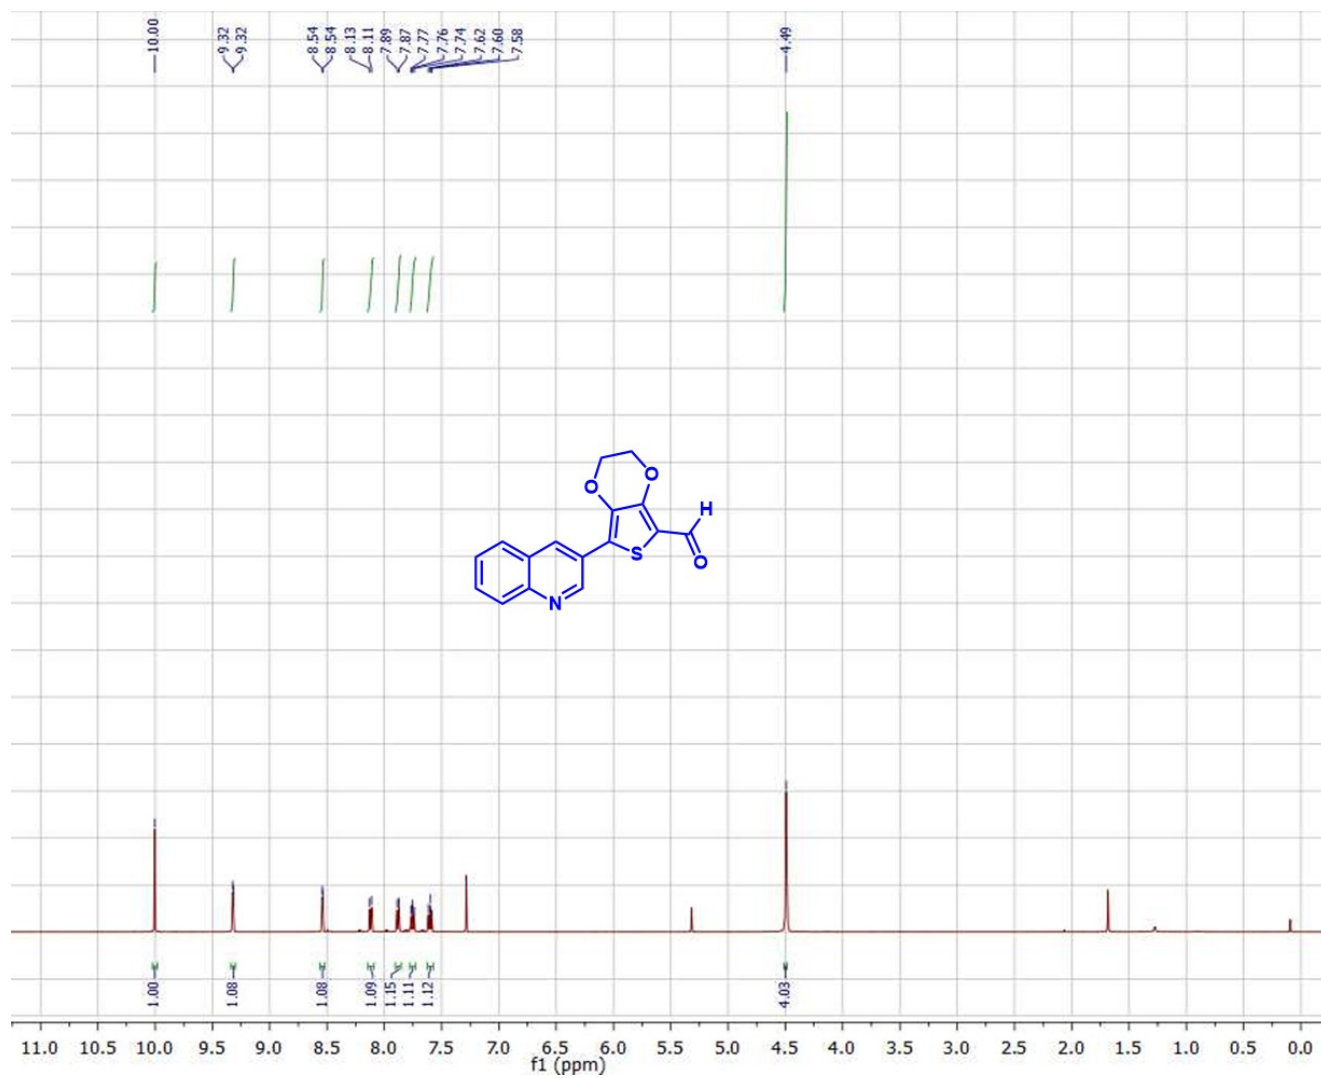

**Figure S6:** <sup>1</sup>H NMR spectrum of compound 5 in CDCl<sub>3</sub> solution.

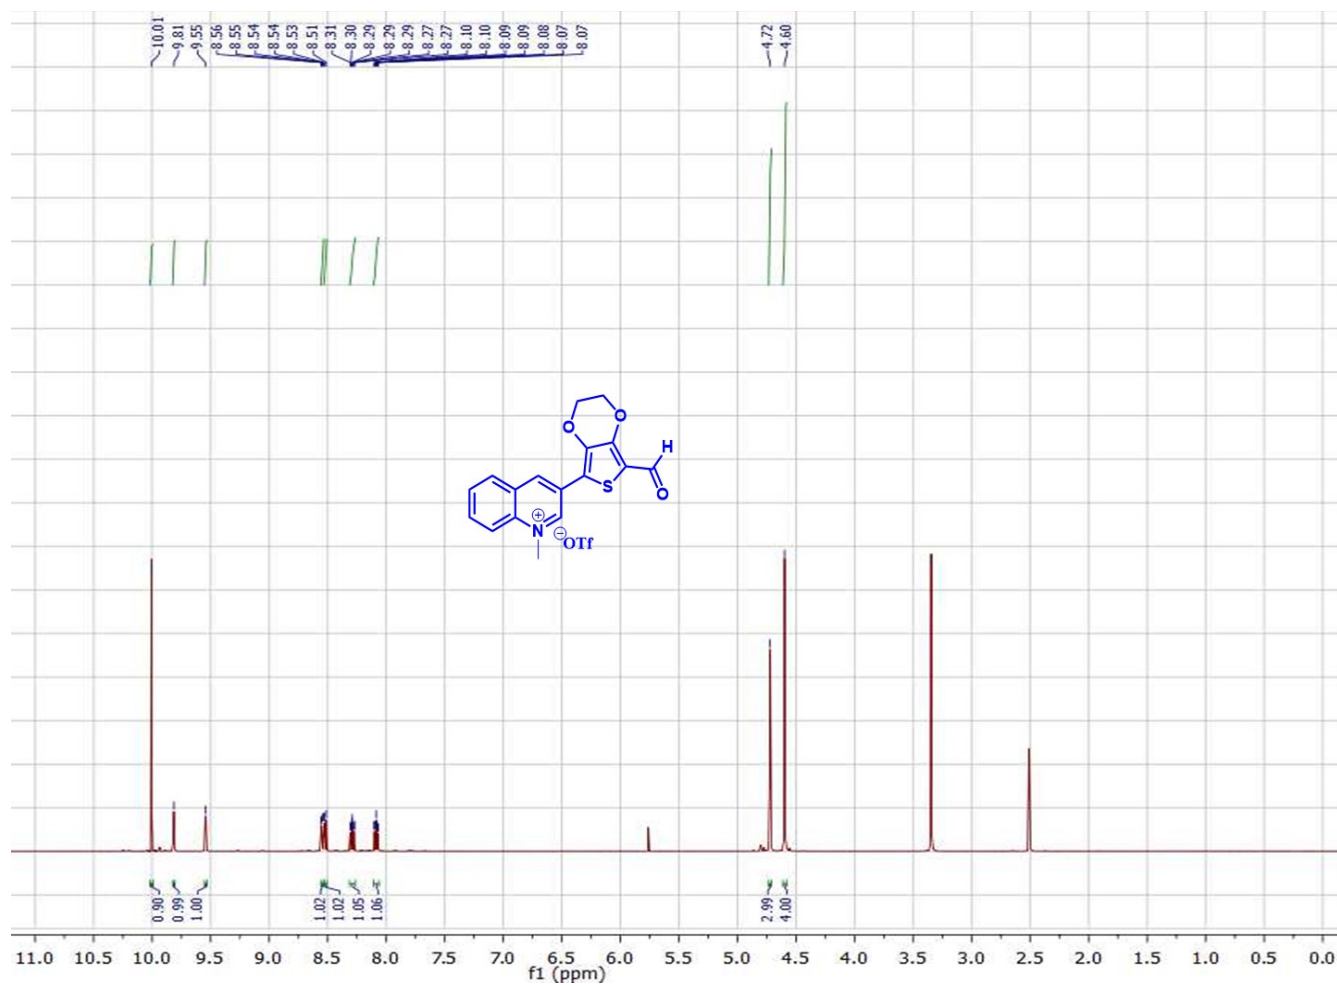

**Figure S7:** <sup>1</sup>H NMR spectrum of Probe B in DMSO-d<sub>6</sub> solution.



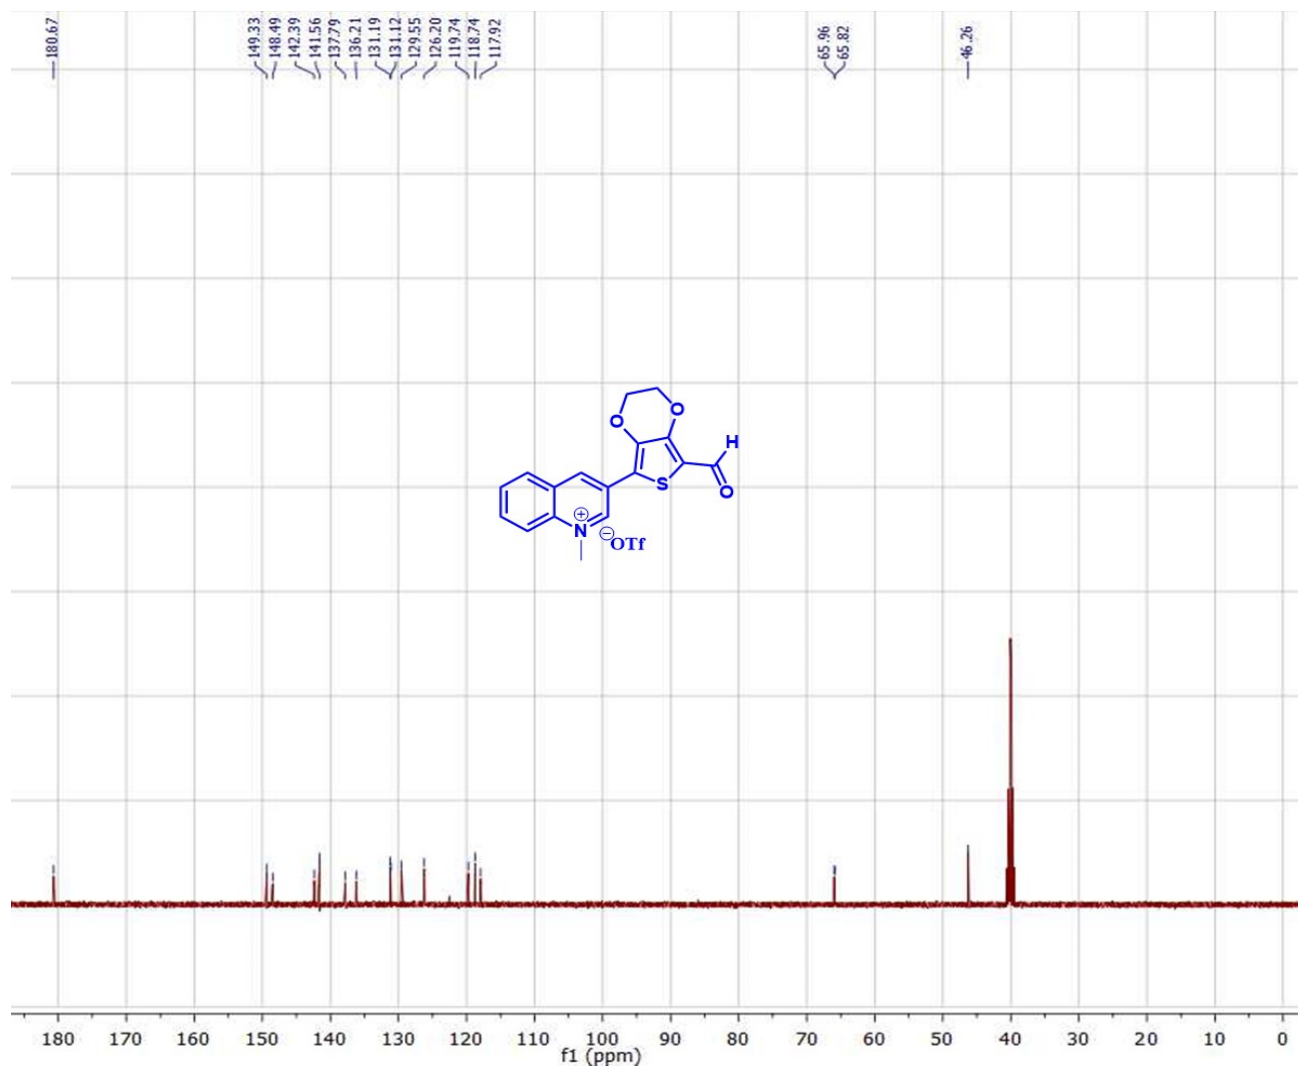

**Figure S8:**  $^{13}\text{C}$  NMR spectrum of Probe **B** in  $\text{DMSO-}d_6$  solution.

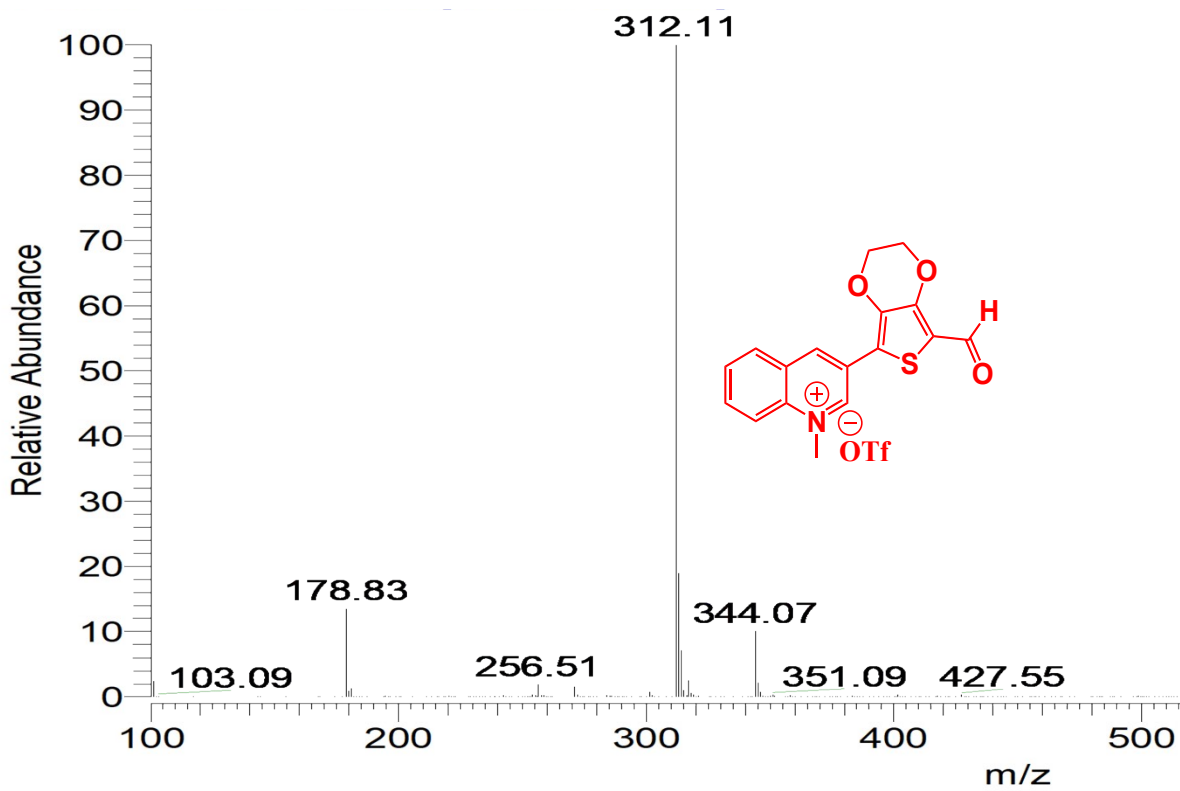

Figure S9: Electrospray MS spectrum of Probe B.

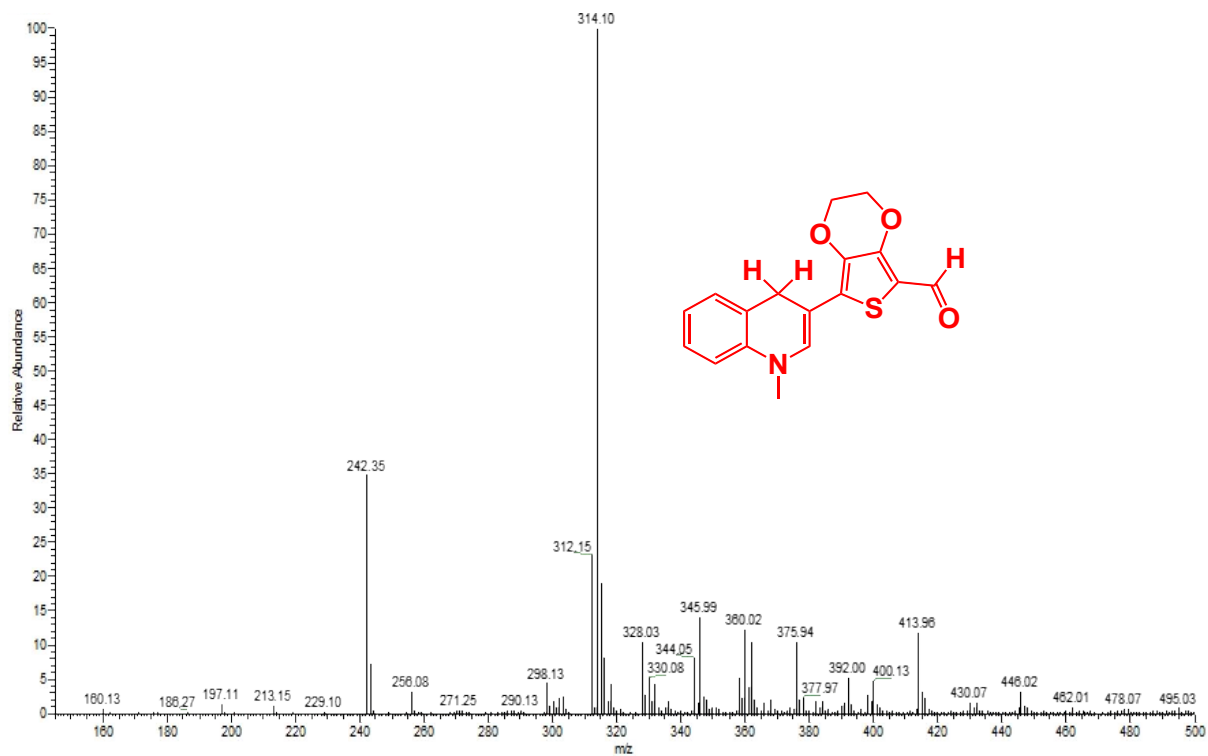

Figure S10: Electrospray MS spectrum of Probe BH.

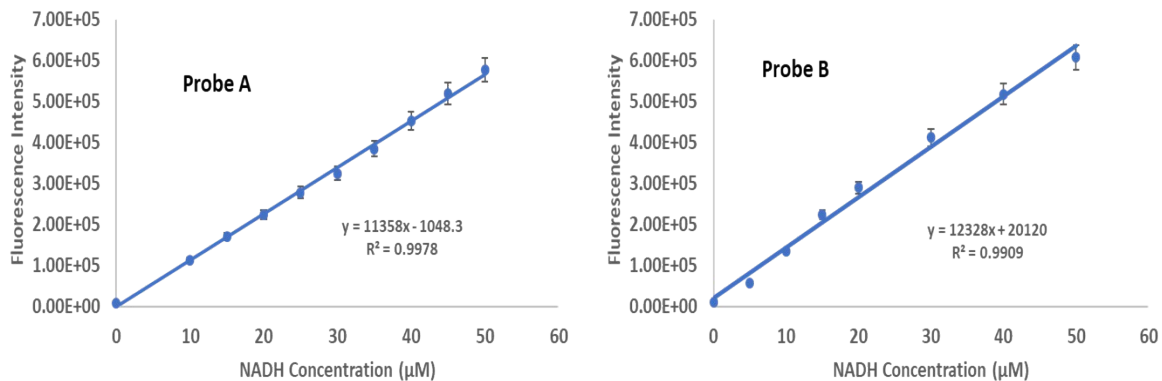

**Figure S11.** Fluorescence intensity changes of Probe **A** and Probe **B** (5  $\mu\text{M}$ ) with different concentration of NADH (0-50  $\mu\text{M}$ ) with four repeated measures. Probes **A** and **B** have a detection limit of 0.03  $\mu\text{M}$  and 0.02  $\mu\text{M}$ , respectively.

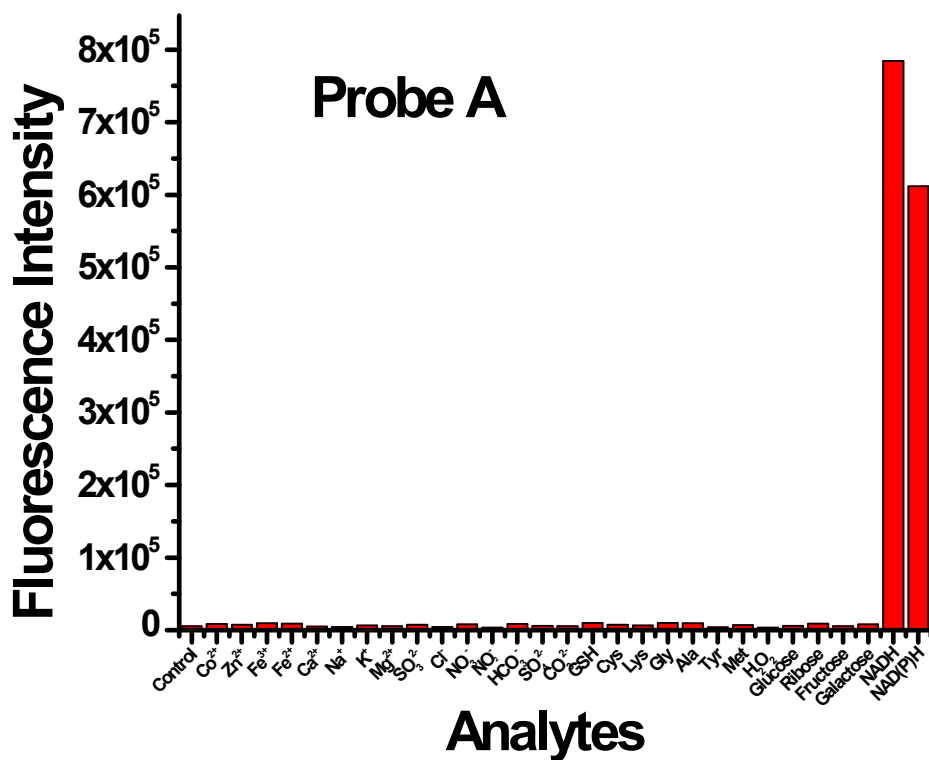

**Figure S12.** The fluorescence response of Probe A at a concentration of 5  $\mu\text{M}$  to various species at 0.1 mM was measured.

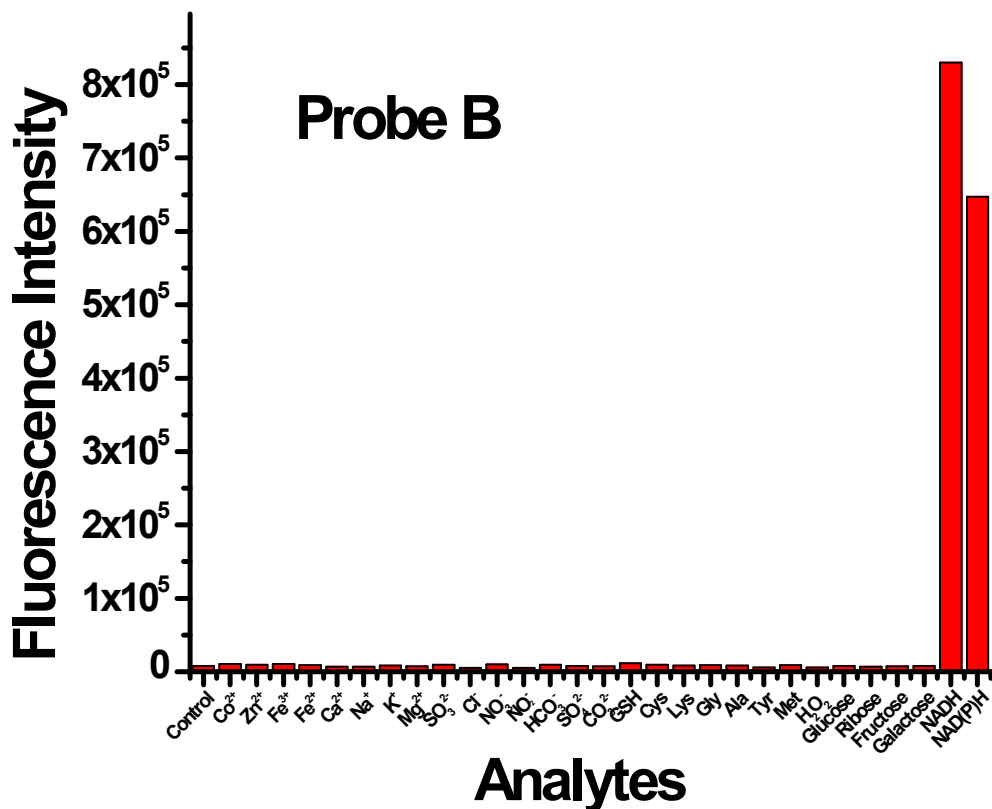

**Figure S13.** The fluorescence response of Probe B at a concentration of 5  $\mu\text{M}$  to various species at 0.1 mM was measured.

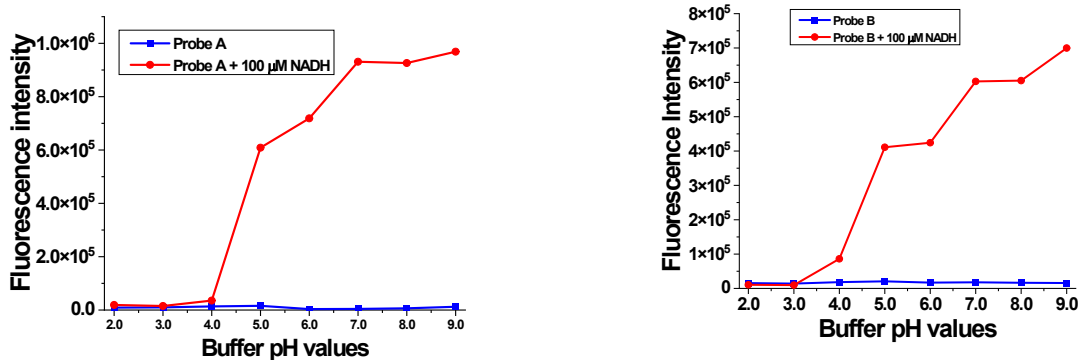

**Figure S14.** The fluorescence responses of Probes A and B in the absence and presence of 0.1 M NADH in different pH buffers.

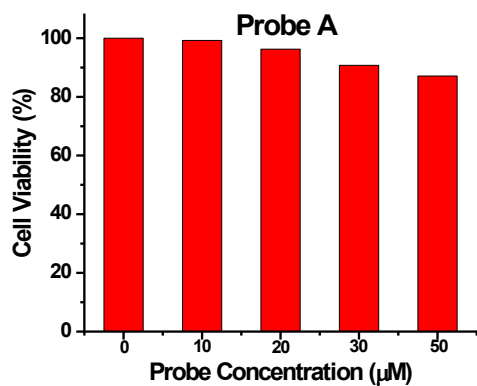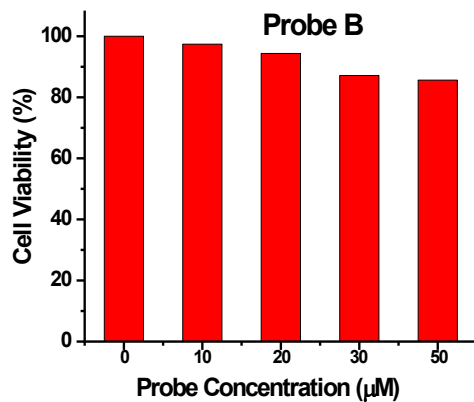

**Figure S15.** MTT assay of A549 cells incubated with Probes **A** (left) and **B** (right) with different concentrations.

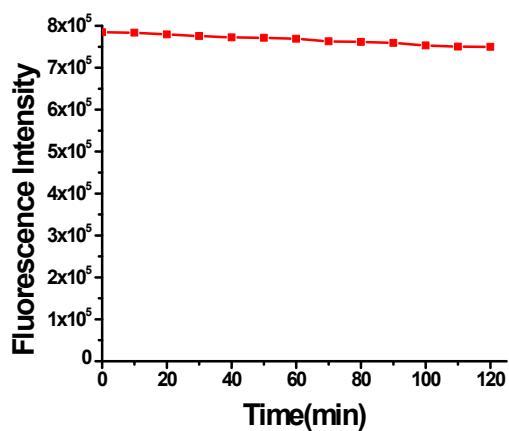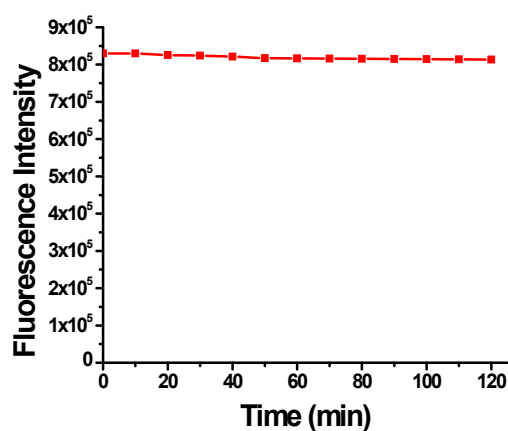

**Figure S16.** Photostability of 5 µM Probes **A** and **B** in the presence of NADH (100 µM).

To compare the imaging capabilities of our probe **A** with a fluorescent probe reported in ACS Sensors 2016, 6(1), 702-709 (Scheme 2), we synthesized and characterized the latter probe by NMR and MS spectrometers and investigated its fluorescence response to NADH. We first examined the probe's optical responses to varying concentrations of NADH. Our findings showed that the probe's fluorescence intensity increased with increasing NADH concentration from 0 to 10  $\mu\text{M}$ . However, at higher concentrations, the probe exhibited fluorescence quenching (Figure 18), limiting its imaging capabilities as we demonstrated later in Figures (S19 and S20).

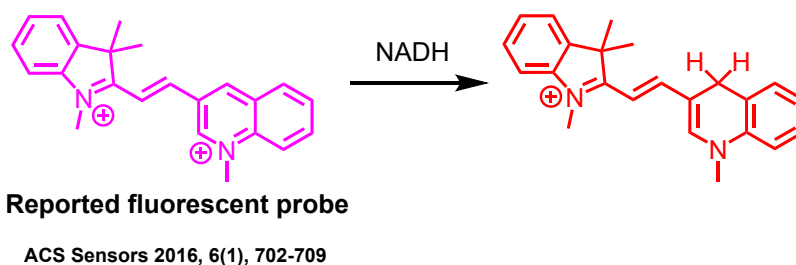

**Scheme 2.** Chemical structures of a reported fluorescent probe in response to NADH.

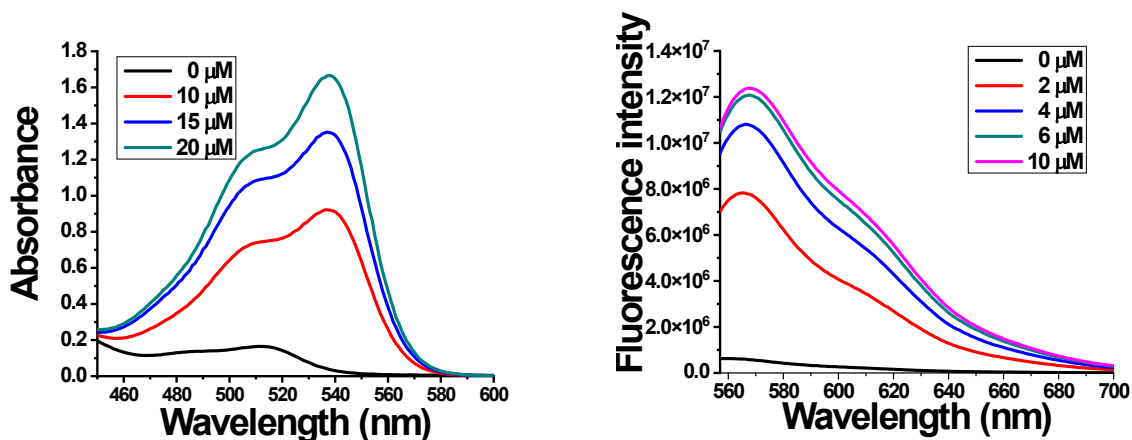

**Figure S17.** Absorption and fluorescence spectra of 20  $\mu\text{M}$  fluorescent probe (reported in ACS Sensors 2016, 6, 702-709) in pH 7.4 PBS buffer containing 5% DMSO solution in the absence and presence of different NADH concentrations under 537 nm excitation.

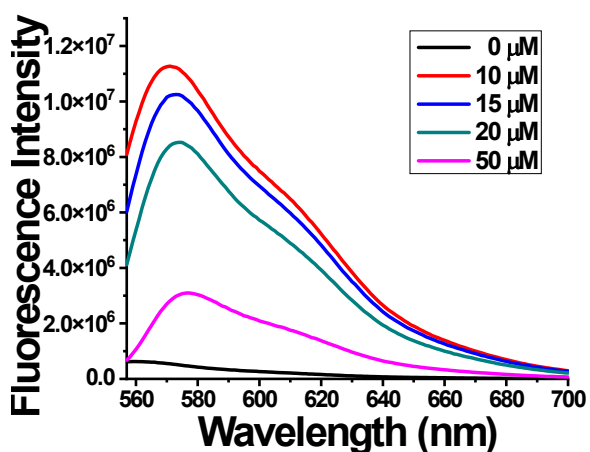

**Figure S18.** Fluorescence spectra of 20  $\mu\text{M}$  fluorescent probe (reported in ACS Sensors 2016, 6, 702-709) in pH 7.4 PBS buffer containing 5% DMSO solution in the absence and presence of different NADH concentrations under 537 nm excitation.

Gemcitabine is a chemotherapeutic drug classified as an antimetabolite that has been utilized for treating various types of cancer.<sup>1-4</sup> By disrupting the process of DNA replication, gemcitabine has been reported to have antitumor effects.<sup>1-4</sup> Moreover, it has been shown to affect cellular metabolism and energy production.<sup>1-4</sup> Figure S19 shows that various concentrations of gemcitabine increased the levels of NAD(P)H in A459 cancer cells. These coenzymes exert an important role in metabolic pathways such as glycolysis and the citric acid cycle, which are fundamental for cellular respiration and ATP production. The precise mechanisms underlying the ability of gemcitabine to increase NAD(P)H levels are not yet fully elucidated, but it is hypothesized that inhibition of ribonucleotide reductase by gemcitabine may trigger a decline in deoxynucleotide levels, leading to a compensatory rise in NAD(P)H levels. These coenzymes are also essential for other metabolic pathways and energy production. Gemcitabine-induced increases in NAD(P)H levels may result from its antitumor effects by changing cellular metabolism and energy production, resulting in cellular stress and ultimately apoptosis. However, further research is needed to fully understand the mechanisms and clinical implications of gemcitabine-induced changes in NAD(P)H levels in cancer cells.



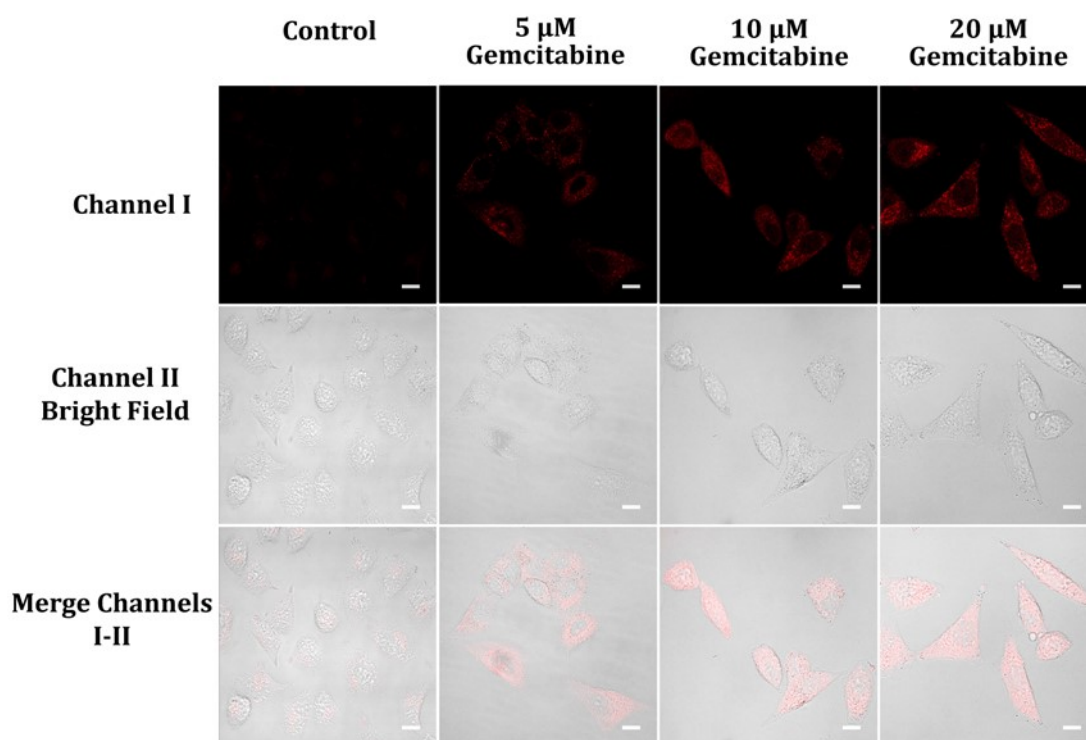

**Figure S19.** Fluorescence images of A459 cells pre-treated with various concentrations of gemcitabine in glucose-deficient DMEM medium for two hours, followed by incubation with 5  $\mu\text{M}$  Probe **A** in cell medium for 30 minutes. The cellular fluorescence was acquired using a 488 nm excitation and emission was collected within the range of 575-675 nm. The scale bars represent 50  $\mu\text{m}$ .

In our study, we used a fluorescent probe previously reported in ACS Sensors, 2016, 6(1), 702-709 to investigate the effects of gemcitabine treatment on NAD(P)H levels in A459 cells under the same identification conditions for comparison purposes. Treatment of A459 cells with 5  $\mu\text{M}$  of the reported probe resulted in a significant increase in NAD(P)H levels, which was consistent with the results obtained using probe **A**. However, increasing the concentration of gemcitabine beyond 10  $\mu\text{M}$  led to a decrease in cellular fluorescence due to fluorescence quenching resulting from an increase in NADH concentration (as shown in Figure 18). This indicates that the reported probe is not suitable for monitoring significant changes in NAD(P)H levels in live cells. On the other hand, Figure S19 shows that our probe **A** effectively monitored different concentrations of gemcitabine-induced changes in NAD(P)H levels in A459 cancer cells. Therefore, our probe is a

suitable tool for monitoring significant changes in NAD(P)H levels in live cells under different chemical treatments (Figures S19, 7-8, 10-14).

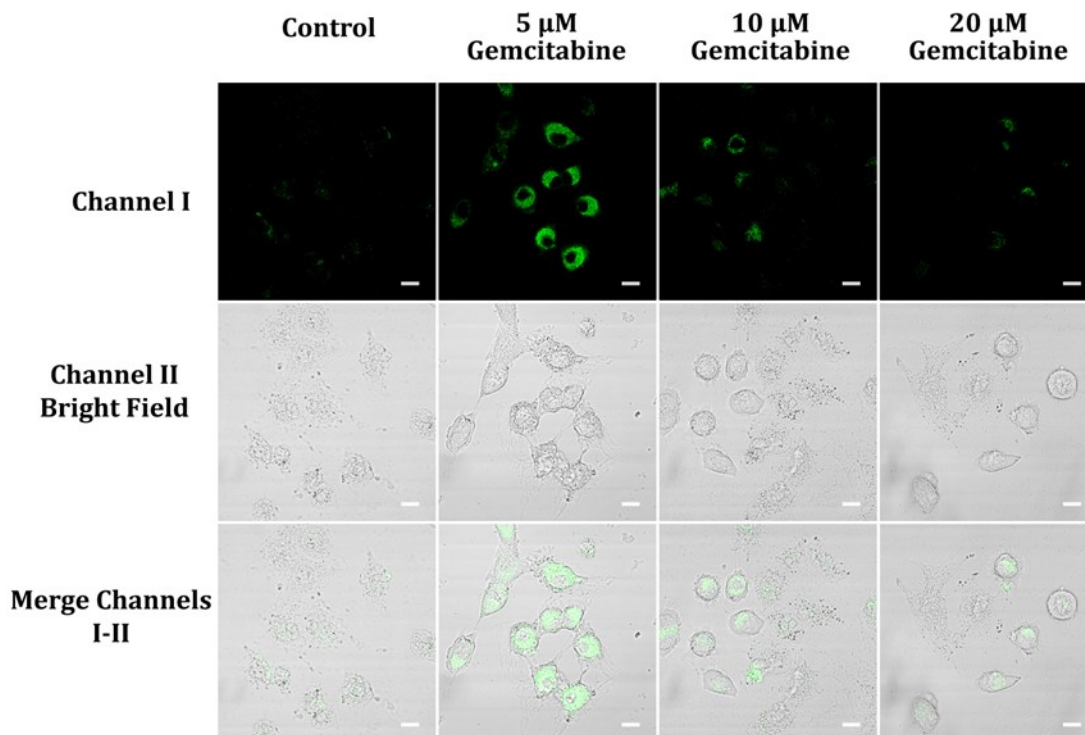

**Figure S20.** Fluorescence images of A459 cells treated with different concentrations of gemcitabine in glucose-deficient DMEM medium for two hours, followed by incubation with 5  $\mu\text{M}$  of a fluorescent probe (previously reported in ACS Sensors, 2016, 6(1), 702-709) in serum-free DMEM medium for 30 minutes. The cells were excited at 488 nm and the emitted fluorescence was collected between 500-600 nm. The scale bars in the images correspond to 50  $\mu\text{m}$ .

## Theoretical Calculations

### Methods:

Models of Probes **A**, **AH**, **B**, and **BH** were generated through the use of Gaussian 16 and density functional theory (DFT), using the APFD functional and electron basis sets at the 6-311+g(d,p) for optimization of the geometry in a Polarizable Continuum Model (PCM) of water. Upon confirming the lack of imaginary frequencies, the CAM-B3LYP/6-311+g(d,p) basis set was used in a TD-DFT calculation to calculate the absorption energies. Results were interpreted using GaussView 6 for all data and figures.

## Results of Theoretical Calculations:

Theoretical Calculations for probe **A**

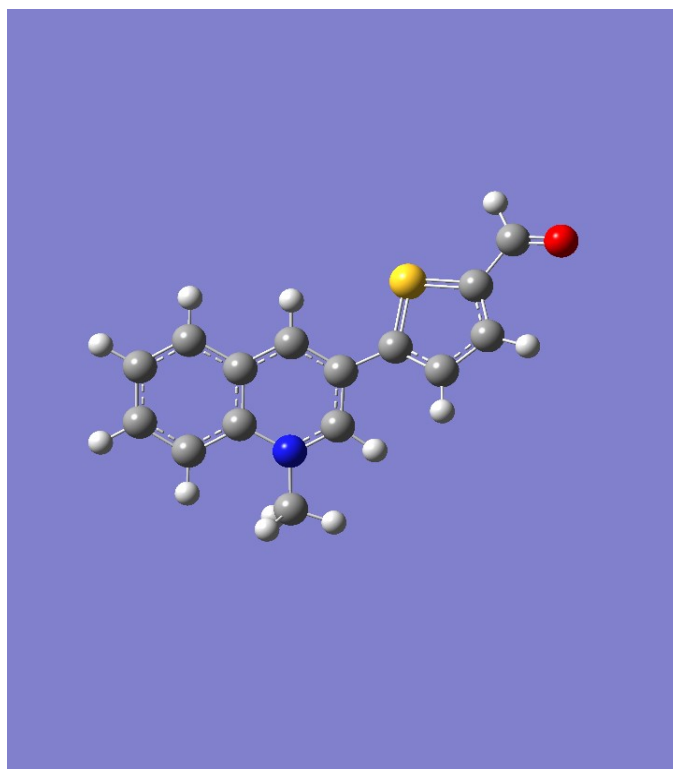

**Figure 21:** GaussView representation of probe **A** optimized geometry.

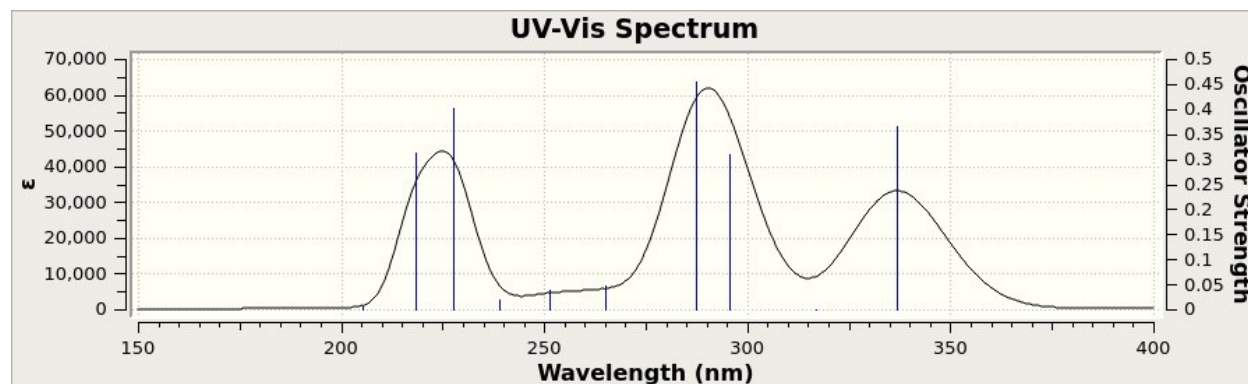

**Figure S22:** Calculated UV-Vis spectrum for Probe **A** in water.

**Table S1:** Calculated atomic coordinates for Probe **A** in water.

| Row | Symbol | X         | Y         | Z         | Row | Symbol | X         | Y         | Z         |
|-----|--------|-----------|-----------|-----------|-----|--------|-----------|-----------|-----------|
| 1   | C      | -4.291870 | -2.041579 | -0.180606 | 16  | S      | 2.381733  | -1.006958 | 0.432633  |
| 2   | C      | -4.949180 | -0.804393 | -0.023352 | 17  | C      | 5.142304  | -0.790921 | 0.247427  |
| 3   | C      | -4.245050 | 0.373455  | 0.085860  | 18  | O      | 6.194380  | -0.243924 | -0.020885 |
| 4   | C      | -2.841538 | 0.337664  | 0.040098  | 19  | H      | 5.128411  | -1.804309 | 0.689989  |
| 5   | C      | -2.163050 | -0.901686 | -0.118163 | 20  | H      | -4.874803 | -2.952007 | -0.264056 |
| 6   | C      | -2.922897 | -2.090200 | -0.228533 | 21  | H      | -6.032877 | -0.775900 | 0.012232  |

|    |   |           |           |           |    |   |           |           |           |
|----|---|-----------|-----------|-----------|----|---|-----------|-----------|-----------|
| 7  | N | -2.080337 | 1.483891  | 0.149169  | 22 | H | -4.778729 | 1.306818  | 0.204807  |
| 8  | C | -0.754908 | 1.445934  | 0.107621  | 23 | H | -2.398968 | -3.032056 | -0.350079 |
| 9  | C | -0.035776 | 0.255041  | -0.066496 | 24 | H | -0.249838 | 2.394509  | 0.230066  |
| 10 | C | -0.760833 | -0.916711 | -0.175413 | 25 | H | -0.254081 | -1.865597 | -0.321705 |
| 11 | C | -2.742523 | 2.782765  | 0.329890  | 26 | H | -3.322053 | 2.768196  | 1.252164  |
| 12 | C | 1.420871  | 0.308669  | -0.124585 | 27 | H | -1.981666 | 3.555442  | 0.390372  |
| 13 | C | 2.205307  | 1.341652  | -0.599528 | 28 | H | -3.390712 | 2.978457  | -0.523218 |
| 14 | C | 3.579131  | 1.063991  | -0.519510 | 29 | H | 1.798941  | 2.254141  | -1.018390 |
| 15 | C | 3.842003  | -0.178048 | 0.016269  | 30 | H | 4.364025  | 1.733983  | -0.847290 |

**Table S2:** Excitation energies and oscillator strengths listing for Probe **A** in water.

| Excited State | Nature | E (eV) | $\lambda_{max}$ (nm) | $f$    | Orbital transitions                                                                          | Normalized coefficient                                                                   |
|---------------|--------|--------|----------------------|--------|----------------------------------------------------------------------------------------------|------------------------------------------------------------------------------------------|
| 1:            | A      | 3.6801 | 336.90               | 0.3662 | 66 -> 67                                                                                     | 0.68032                                                                                  |
| 2:            | A      | 3.9117 | 316.96               | 0.0003 | 63 -> 67<br>63 -> 68<br>63 -> 69<br>63 -> 72                                                 | -0.28161<br>0.51882<br>-0.32264<br>0.14713                                               |
| 3:            | A      | 4.1936 | 295.65               | 0.3108 | 62 -> 67<br>64 -> 67<br>64 -> 69<br>65 -> 67<br>66 -> 68                                     | -0.16517<br>-0.11120<br>0.10283<br>-0.18911<br>0.61875                                   |
| Excited State | Nature | E (eV) | $\lambda_{max}$ (nm) | $f$    | Orbital transitions                                                                          | Normalized coefficient                                                                   |
| 4:            | A      | 4.3160 | 287.26               | 0.4548 | 62 -> 68<br>64 -> 67<br>65 -> 67<br>66 -> 68<br>66 -> 69                                     | 0.11158<br>0.35188<br>0.51361<br>0.25524<br>-0.13535                                     |
| 5:            | A      | 4.6805 | 264.89               | 0.0488 | 64 -> 67<br>64 -> 68<br>65 -> 67<br>65 -> 68                                                 | 0.50796<br>-0.24024<br>-0.31545<br>0.21527                                               |
| 6:            | A      | 4.9311 | 251.43               | 0.0398 | 62 -> 67<br>62 -> 68<br>65 -> 67<br>65 -> 68<br>65 -> 69<br>66 -> 67<br>66 -> 68<br>66 -> 69 | 0.53322<br>0.13518<br>-0.16183<br>-0.24275<br>-0.10774<br>0.13206<br>0.13209<br>-0.16770 |
| 7:            | A      | 5.1892 | 238.93               | 0.0183 | 62 -> 67<br>64 -> 67                                                                         | -0.11927<br>0.28063                                                                      |

|     |   |        |        |        |          |          |
|-----|---|--------|--------|--------|----------|----------|
|     |   |        |        |        | 64 -> 68 | 0.47569  |
|     |   |        |        |        | 65 -> 67 | -0.19425 |
|     |   |        |        |        | 65 -> 68 | -0.31907 |
| 8:  | A | 5.4496 | 227.51 | 0.4016 | 62 -> 67 | 0.24729  |
|     |   |        |        |        | 62 -> 68 | -0.10388 |
|     |   |        |        |        | 64 -> 68 | 0.17828  |
|     |   |        |        |        | 65 -> 67 | 0.10716  |
|     |   |        |        |        | 66 -> 69 | 0.58600  |
| 9:  | A | 5.6788 | 218.33 | 0.3121 | 62 -> 67 | 0.25848  |
|     |   |        |        |        | 64 -> 68 | 0.28912  |
|     |   |        |        |        | 64 -> 69 | 0.13382  |
|     |   |        |        |        | 65 -> 68 | 0.44213  |
|     |   |        |        |        | 65 -> 69 | 0.24417  |
|     |   |        |        |        | 66 -> 69 | -0.15218 |
|     |   |        |        |        | 66 -> 70 | -0.11215 |
| 10: | A | 6.0378 | 205.35 | 0.0043 | 63 -> 67 | 0.63224  |
|     |   |        |        |        | 63 -> 68 | 0.21384  |
|     |   |        |        |        | 63 -> 69 | -0.12582 |
|     |   |        |        |        | 63 -> 72 | 0.11099  |

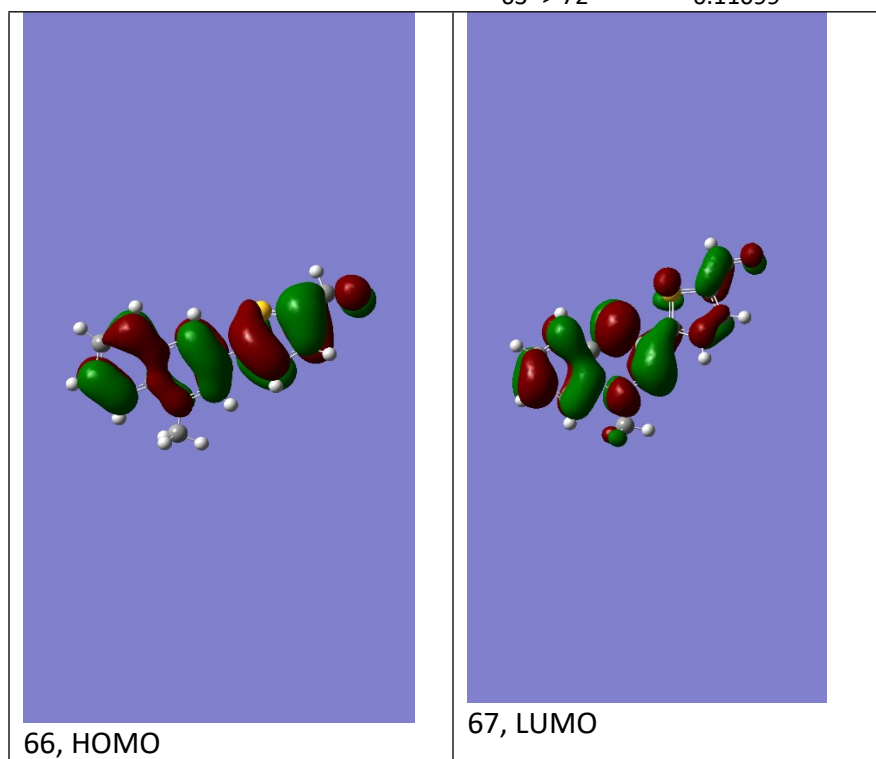

**Figure S23:** Drawing of selected molecular orbitals listed in Table S1.

Theoretical calculations for Probe **AH**

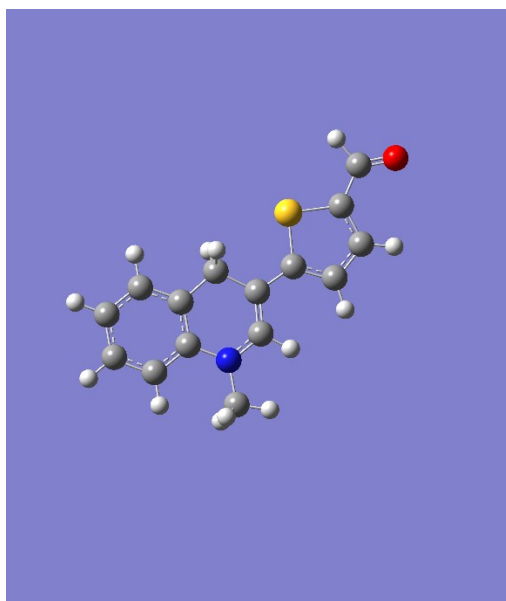

Figure S24: GaussView representation of Probe AH optimized geometry.

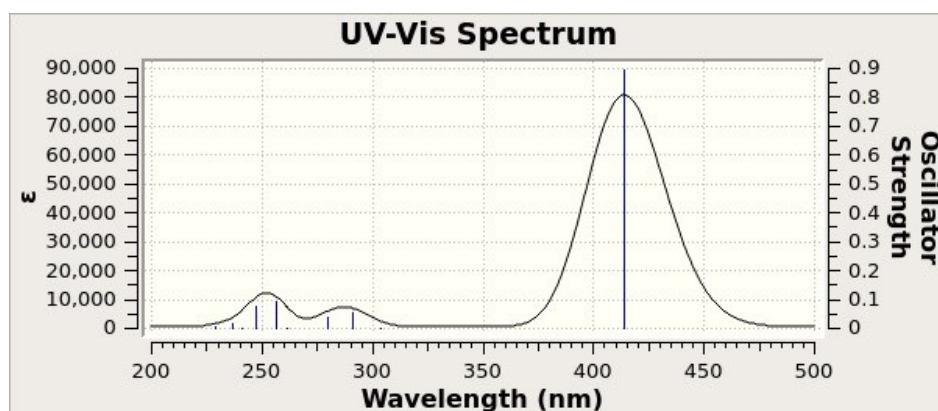

Figure S25: Calculated UV-Vis spectrum for Probe AH in water.

Table S3: Calculated atomic coordinates for Probe AH in water.

| Row | Symbol | X         | Y         | Z         | Row | Symbol | X         | Y         | Z         |
|-----|--------|-----------|-----------|-----------|-----|--------|-----------|-----------|-----------|
| 1   | C      | -4.323192 | -2.050473 | 0.060521  | 17  | O      | 5.126039  | -0.872498 | -0.005429 |
| 2   | C      | -4.976991 | -0.822960 | 0.059456  | 18  | H      | 6.221493  | -0.321634 | 0.035697  |
| 3   | C      | -4.247452 | 0.359419  | 0.024746  | 19  | H      | 5.064876  | -1.977125 | -0.057953 |
| 4   | C      | -2.847261 | 0.328742  | -0.011771 | 20  | H      | -4.887107 | -2.977083 | 0.089144  |
| 5   | C      | -2.178331 | -0.907749 | -0.015196 | 21  | H      | -6.061151 | -0.777316 | 0.087275  |
| 6   | C      | -2.932231 | -2.076203 | 0.024190  | 22  | H      | -4.776667 | 1.304269  | 0.028389  |
| 7   | N      | -2.106735 | 1.516446  | -0.039067 | 23  | H      | -2.409478 | -3.029294 | 0.023363  |
| 8   | C      | -0.748144 | 1.478557  | -0.022758 | 24  | H      | -0.279227 | 2.454338  | -0.011686 |
| 9   | C      | -0.002641 | 0.342869  | -0.021496 | 25  | H      | -0.375765 | -1.538525 | -0.983962 |

|    |   |           |           |           |    |   |           |           |           |
|----|---|-----------|-----------|-----------|----|---|-----------|-----------|-----------|
| 10 | C | -0.674474 | -1.002176 | -0.069848 | 26 | H | -0.321053 | -1.630658 | 0.760920  |
| 11 | C | -2.783548 | 2.800319  | -0.045200 | 27 | H | -2.036266 | 3.590688  | -0.077799 |
| 12 | C | 1.430202  | 0.412370  | 0.005480  | 28 | H | -3.427574 | 2.896681  | -0.923411 |
| 13 | C | 2.282091  | 1.519506  | 0.075161  | 29 | H | -3.387649 | 2.930153  | 0.857241  |
| 14 | C | 3.633221  | 1.183214  | 0.075012  | 30 | H | 1.924477  | 2.540107  | 0.128905  |
| 15 | C | 3.867921  | -0.182244 | 0.008753  | 31 | H | 4.441752  | 1.903066  | 0.125412  |
| 16 | S | 2.359673  | -1.049718 | -0.056729 |    |   |           |           |           |

**Table S4:** Excitation energies and oscillator strengths listed for Probe AH.

| Excited State | Nature | E (eV) | $\lambda_{max}$ (nm) | $f$    | Orbital transitions                                                              | Normalized coefficient                                                        |
|---------------|--------|--------|----------------------|--------|----------------------------------------------------------------------------------|-------------------------------------------------------------------------------|
| 1:            | A      | 2.9934 | 414.20               | 0.8941 | 67 -> 68<br>67 -> 69                                                             | 0.67970<br>0.13983                                                            |
| 2:            | A      | 4.0800 | 303.88               | 0.0002 | 63 -> 68<br>63 -> 69                                                             | 0.61769<br>-0.28480                                                           |
| 3:            | A      | 4.2574 | 291.22               | 0.0563 | 66 -> 68<br>67 -> 68<br>67 -> 69                                                 | -0.19527<br>-0.11712<br>0.63597                                               |
| 4:            | A      | 4.4270 | 280.06               | 0.0378 | 65 -> 68<br>66 -> 70<br>67 -> 70                                                 | -0.10648<br>-0.17557<br>0.64299                                               |
| 5:            | A      | 4.7439 | 261.35               | 0.0009 | 67 -> 71<br>67 -> 75<br>67 -> 77<br>67 -> 78                                     | 0.64193<br>0.14325<br>-0.13143<br>0.10390                                     |
| 6:            | A      | 4.8388 | 256.23               | 0.0904 | 62 -> 68<br>64 -> 68<br>66 -> 68<br>66 -> 69<br>67 -> 69                         | -0.13203<br>0.18129<br>0.61720<br>0.10296<br>0.17047                          |
| 7:            | A      | 5.0143 | 247.26               | 0.0736 | 64 -> 68<br>65 -> 68<br>66 -> 68<br>67 -> 69                                     | 0.61618<br>0.19437<br>-0.16313<br>-0.12373                                    |
| 8:            | A      | 5.1487 | 240.81               | 0.0002 | 67 -> 72<br>67 -> 75<br>67 -> 76<br>67 -> 77<br>67 -> 78<br>67 -> 83<br>67 -> 85 | -0.29191<br>0.38124<br>-0.22231<br>-0.24234<br>-0.16399<br>0.20902<br>0.11189 |

| 9:            | A      | 5.2367 | 236.76               | 0.0164   | 64 -> 68<br>66 -> 69<br>67 -> 74                                                 | -0.11951<br>0.15377<br>0.64127                                                |
|---------------|--------|--------|----------------------|----------|----------------------------------------------------------------------------------|-------------------------------------------------------------------------------|
| Excited State | Nature | E (eV) | $\lambda_{max}$ (nm) | <i>f</i> | Orbital transitions                                                              | Normalized coefficient                                                        |
| 10:           | A      | 5.4214 | 228.69               | 0.0071   | 66 -> 71<br>67 -> 72<br>67 -> 73<br>67 -> 75<br>67 -> 76<br>67 -> 79<br>67 -> 82 | 0.13028<br>0.53869<br>-0.10691<br>0.23979<br>-0.19154<br>-0.14756<br>-0.17360 |

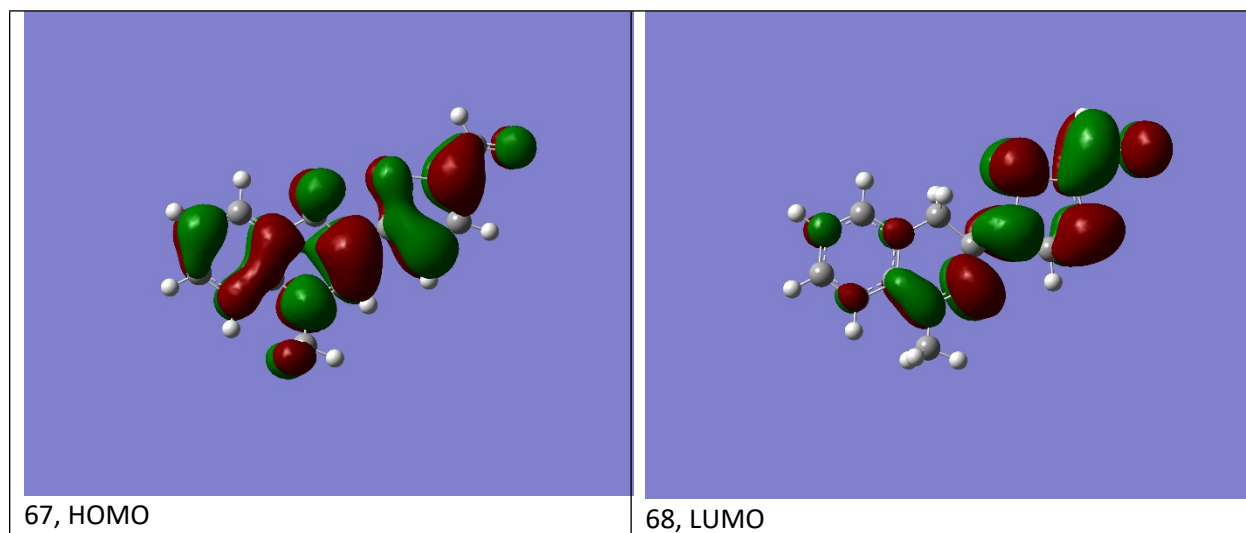

**Figure S26:** Drawings of selected molecular orbitals listed in Table S2.



Theoretical calculations for probe **B**.

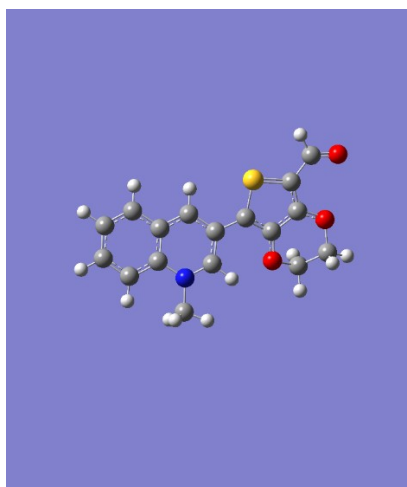

**Figure S27:** GaussView representation of Probe **B** optimized geometry.

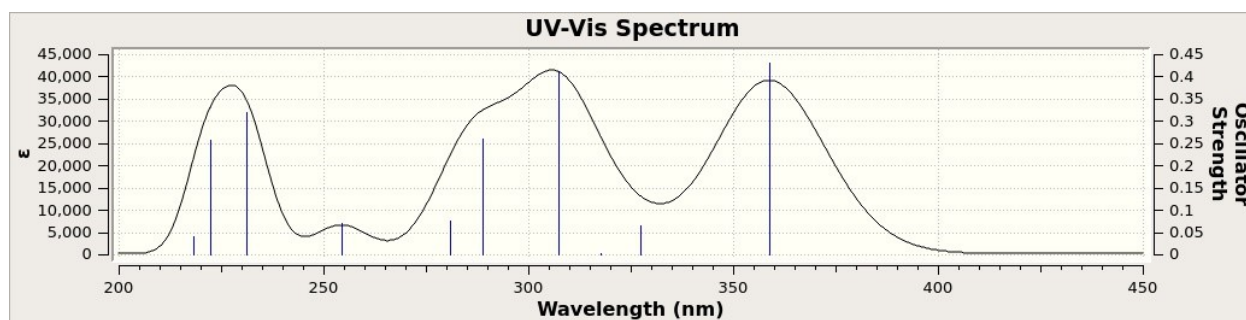

**Figure S28:** Calculated UV-Vis spectrum for Probe **B**.

**Table S5:** Calculated atomic coordinates for Probe **B** in water.

| Row | Symbol | X         | Y         | Z         | Row | Symbol | X         | Y         | Z         |
|-----|--------|-----------|-----------|-----------|-----|--------|-----------|-----------|-----------|
| 1   | C      | 5.235363  | -1.717320 | -0.406222 | 19  | H      | -3.926040 | -3.259370 | 0.406748  |
| 2   | C      | 5.699053  | -0.411222 | -0.146401 | 20  | O      | -1.495234 | 1.924993  | -0.259665 |
| 3   | C      | 4.825319  | 0.623416  | 0.100053  | 21  | C      | -2.634831 | 2.626921  | -0.785448 |
| 4   | C      | 3.443904  | 0.368693  | 0.092866  | 22  | C      | -3.887874 | 2.239684  | -0.033047 |
| 5   | C      | 2.959458  | -0.941955 | -0.166771 | 23  | O      | -4.157609 | 0.832451  | -0.170412 |
| 6   | C      | 3.890032  | -1.978906 | -0.417233 | 24  | H      | 5.948386  | -2.511577 | -0.597206 |
| 7   | N      | 2.518317  | 1.362732  | 0.333591  | 25  | H      | 6.765594  | -0.213982 | -0.140129 |
| 8   | C      | 1.213613  | 1.122194  | 0.330145  | 26  | H      | 5.210424  | 1.615175  | 0.295488  |
| 9   | C      | 0.678631  | -0.151158 | 0.070123  | 27  | H      | 3.514473  | -2.977101 | -0.615067 |
| 10  | C      | 1.576655  | -1.174714 | -0.179326 | 28  | H      | 0.573412  | 1.967145  | 0.538180  |
| 11  | C      | 2.975603  | 2.731433  | 0.607190  | 29  | H      | 1.223180  | -2.177641 | -0.398347 |
| 12  | C      | -0.761030 | -0.347273 | 0.079749  | 30  | H      | 3.531488  | 3.105231  | -0.252069 |
| 13  | C      | -1.743032 | 0.611035  | -0.076417 | 31  | H      | 2.106093  | 3.359307  | 0.777475  |
| 14  | C      | -3.061309 | 0.074803  | -0.043542 | 32  | H      | 3.605127  | 2.733088  | 1.496139  |
| 15  | C      | -3.069471 | -1.298888 | 0.123571  | 33  | H      | -2.421773 | 3.687610  | -0.662130 |
| 16  | S      | -1.453079 | -1.917090 | 0.269619  | 34  | H      | -2.728271 | 2.393540  | -1.850524 |
| 17  | C      | -4.193739 | -2.200452 | 0.223454  | 35  | H      | -4.757690 | 2.753766  | -0.439414 |
| 18  | O      | -5.360997 | -1.866256 | 0.120506  | 36  | H      | -3.790703 | 2.471864  | 1.031906  |

**Table S6:** Excitation energies and oscillator strengths for Probe **B** in water.

| Excited State | Nature | E (eV) | $\lambda_{max}$ (nm) | $f$    | Orbital transitions                                                                                      | Normalized coefficient                                                                                |
|---------------|--------|--------|----------------------|--------|----------------------------------------------------------------------------------------------------------|-------------------------------------------------------------------------------------------------------|
| 1:            | A      | 3.4543 | 358.92               | 0.4319 | 81 -> 82                                                                                                 | 0.68702                                                                                               |
| 2:            | A      | 3.7877 | 327.34               | 0.0647 | 80 -> 82<br>80 -> 83                                                                                     | 0.64207<br>0.23089                                                                                    |
| 3:            | A      | 3.9046 | 317.53               | 0.0020 | 78 -> 82<br>78 -> 83<br>78 -> 84<br>78 -> 90                                                             | 0.33041<br>0.47862<br>0.31927<br>0.13540                                                              |
| 4:            | A      | 4.0326 | 307.45               | 0.4110 | 77 -> 82<br>79 -> 84<br>80 -> 83<br>81 -> 83                                                             | 0.12792<br>-0.10974<br>-0.12732<br>0.65408                                                            |
| 5:            | A      | 4.2933 | 288.79               | 0.2597 | 77 -> 83<br>79 -> 82<br>80 -> 83<br>81 -> 83<br>81 -> 84                                                 | -0.10558<br>0.64670<br>-0.11337<br>-0.13378<br>-0.12592                                               |
| 6:            | A      | 4.4134 | 280.92               | 0.0759 | 77 -> 82<br>80 -> 82<br>80 -> 83<br>80 -> 84                                                             | 0.15253<br>-0.23737<br>0.61318<br>0.10564                                                             |
| 7:            | A      | 4.8744 | 254.36               | 0.0716 | 77 -> 82<br>77 -> 83<br>79 -> 82<br>79 -> 83<br>79 -> 84<br>80 -> 83<br>81 -> 82<br>81 -> 83<br>81 -> 84 | 0.53749<br>-0.12904<br>-0.11811<br>0.24012<br>-0.13238<br>-0.11294<br>0.11098<br>-0.13113<br>-0.16112 |
| 8:            | A      | 5.3651 | 231.10               | 0.3200 | 77 -> 82<br>81 -> 84                                                                                     | 0.24265<br>0.60172                                                                                    |
| 9:            | A      | 5.5760 | 222.36               | 0.2567 | 77 -> 82<br>79 -> 83<br>79 -> 84                                                                         | 0.18884<br>-0.35199<br>0.15573                                                                        |

|     |   |        |        |        |          |          |
|-----|---|--------|--------|--------|----------|----------|
|     |   |        |        |        | 80 -> 84 | 0.44437  |
|     |   |        |        |        | 80 -> 89 | -0.12092 |
|     |   |        |        |        | 81 -> 84 | -0.14152 |
| 10: | A | 5.6812 | 218.24 | 0.0403 | 79 -> 83 | -0.20490 |
|     |   |        |        |        | 80 -> 85 | 0.12475  |
|     |   |        |        |        | 80 -> 87 | -0.31893 |
|     |   |        |        |        | 80 -> 88 | -0.26514 |
|     |   |        |        |        | 80 -> 89 | 0.32027  |
|     |   |        |        |        | 80 -> 93 | -0.10019 |
|     |   |        |        |        | 80 -> 94 | 0.12582  |
|     |   |        |        |        | 80 -> 97 | 0.15705  |
|     |   |        |        |        | 80 -> 98 | 0.12716  |

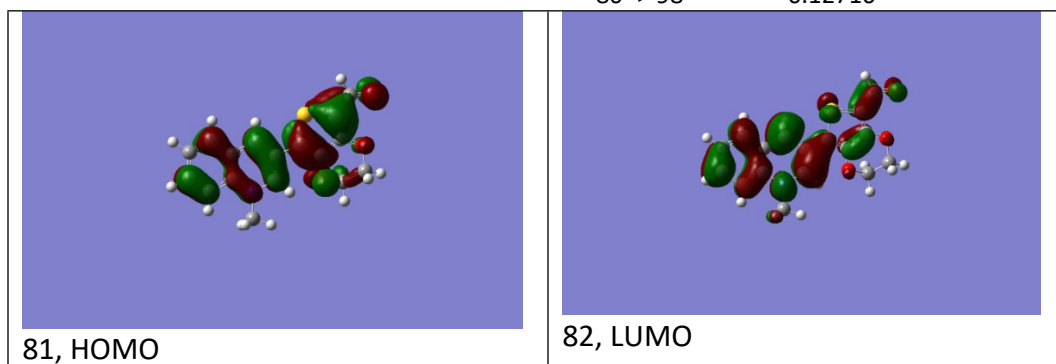

**Figure S29:** Drawings of selected molecular orbitals listed in Table S3.

Theoretical calculations for Probe **BH**.

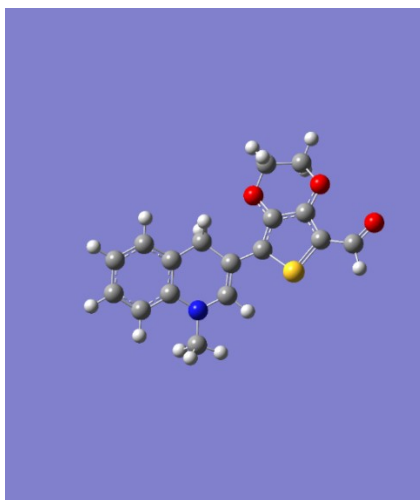

**Figure S30:** GaussView representation of Probe **BH** optimized geometry.

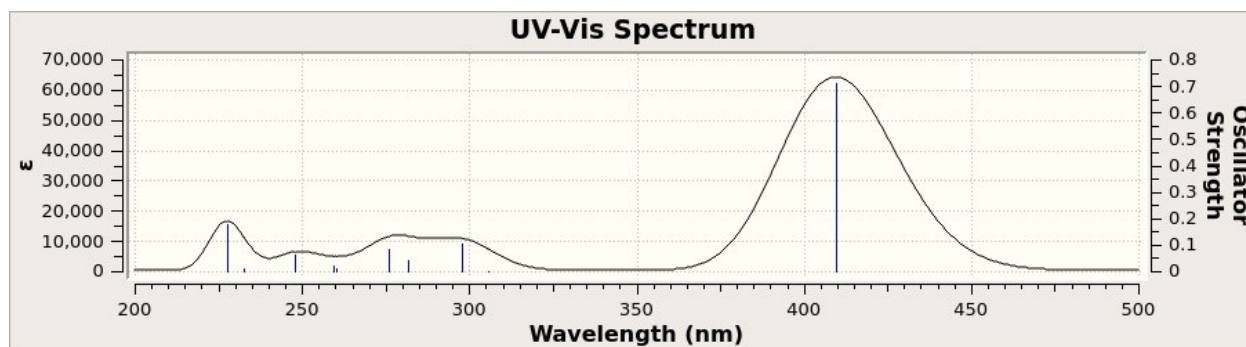

**Figure S31:** Calculated UV-Vis spectrum for Probe **BH** in water.

**Table S7:** Calculated atomic coordinated of Probe **BH** in water.

| Row | Symbol | X         | Y         | Z         | Row | Symbol | X         | Y         | Z         |
|-----|--------|-----------|-----------|-----------|-----|--------|-----------|-----------|-----------|
| 1   | C      | 4.360901  | 1.600966  | -0.787839 | 20  | O      | -2.000181 | 1.770751  | 0.626221  |
| 2   | C      | 4.955463  | 0.363083  | -0.569504 | 21  | C      | -3.001704 | 2.768861  | 0.411534  |
| 3   | C      | 4.184862  | -0.728933 | -0.183966 | 22  | C      | -4.371921 | 2.228717  | 0.760970  |
| 4   | C      | 2.804205  | -0.588560 | 0.002404  | 23  | O      | -4.713863 | 1.108834  | -0.072993 |
| 5   | C      | 2.198345  | 0.666522  | -0.190107 | 24  | H      | 4.957183  | 2.453481  | -1.096550 |
| 6   | C      | 2.987126  | 1.735823  | -0.599293 | 25  | H      | 6.024792  | 0.235599  | -0.707026 |
| 7   | N      | 2.005032  | -1.683970 | 0.347178  | 26  | H      | 4.665158  | -1.688982 | -0.038467 |
| 8   | C      | 0.647787  | -1.594545 | 0.208771  | 27  | H      | 2.511999  | 2.700770  | -0.756596 |
| 9   | C      | -0.023970 | -0.432354 | 0.019361  | 28  | H      | 0.125759  | -2.543705 | 0.266693  |
| 10  | C      | 0.732020  | 0.871337  | 0.097330  | 29  | H      | 0.315801  | 1.599678  | -0.604013 |
| 11  | C      | 2.606151  | -2.981888 | 0.586327  | 30  | H      | 0.609684  | 1.320263  | 1.093367  |
| 12  | C      | -1.444678 | -0.431819 | -0.211295 | 31  | H      | 1.827859  | -3.676964 | 0.896130  |
| 13  | C      | -2.346677 | 0.589154  | 0.047762  | 32  | H      | 3.089379  | -3.374526 | -0.314876 |
| 14  | C      | -3.686453 | 0.269421  | -0.283223 | 33  | H      | 3.346131  | -2.919123 | 1.387528  |
| 15  | C      | -3.826486 | -1.004143 | -0.821628 | 34  | H      | -2.745667 | 3.609123  | 1.056342  |
| 16  | S      | -2.265721 | -1.782302 | -0.923440 | 35  | H      | -2.969210 | 3.092054  | -0.635358 |
| 17  | C      | -5.002202 | -1.698485 | -1.248134 | 36  | H      | -5.143550 | 2.978783  | 0.590347  |
| 18  | O      | -6.139365 | -1.238980 | -1.265375 | 37  | H      | -4.403409 | 1.905568  | 1.806396  |
| 19  | H      | -4.822552 | -2.739737 | -1.585030 |     |        |           |           |           |

**Table S8:** Excitation energies and oscillator strengths listing for Probe **BH** in water.

| Excited State | Nature | E (eV) | $\lambda_{exc}$ (nm) | $f$    | Orbital transitions | Normalized coefficient |
|---------------|--------|--------|----------------------|--------|---------------------|------------------------|
| 1:            | A      | 3.0272 | 409.57               | 0.7114 | 82 -> 83            | 0.68254                |
| 2:            | A      | 4.0569 | 305.61               | 0.0023 | 77 -> 83            | 0.11931                |
|               |        |        |                      |        | 78 -> 83            | 0.61383                |
|               |        |        |                      |        | 78 -> 84            | -0.16308               |
|               |        |        |                      |        | 78 -> 85            | 0.13734                |
|               |        |        |                      |        | 78 -> 86            | -0.11236               |
| 3:            | A      | 4.1616 | 297.92               | 0.1069 | 80 -> 83            | 0.12686                |
|               |        |        |                      |        | 81 -> 83            | 0.67495                |
| 4:            | A      | 4.4037 | 281.54               | 0.0418 | 80 -> 83            | -0.31685               |
|               |        |        |                      |        | 80 -> 84            | -0.10837               |
|               |        |        |                      |        | 82 -> 84            | 0.57921                |
| 5:            | A      | 4.4925 | 275.98               | 0.0858 | 77 -> 83            | 0.10110                |
|               |        |        |                      |        | 80 -> 83            | -0.35180               |
|               |        |        |                      |        | 80 -> 84            | 0.11357                |
|               |        |        |                      |        | 82 -> 84            | -0.13232               |
|               |        |        |                      |        | 82 -> 85            | -0.37100               |
|               |        |        |                      |        | 82 -> 86            | 0.38313                |
| 6:            | A      | 4.7604 | 260.45               | 0.0104 | 80 -> 83            | -0.12620               |
|               |        |        |                      |        | 82 -> 85            | 0.46880                |
|               |        |        |                      |        | 82 -> 86            | 0.30841                |
|               |        |        |                      |        | 82 -> 87            | -0.16211               |
|               |        |        |                      |        | 82 -> 89            | -0.23775               |
|               |        |        |                      |        | 82 -> 90            | 0.13351                |
|               |        |        |                      |        | 82 -> 92            | -0.13497               |
| 7:            | A      | 4.7782 | 259.48               | 0.0206 | 77 -> 83            | -0.12863               |
|               |        |        |                      |        | 80 -> 83            | 0.40893                |
|               |        |        |                      |        | 81 -> 83            | -0.13548               |
|               |        |        |                      |        | 82 -> 83            | -0.10664               |
|               |        |        |                      |        | 82 -> 84            | 0.25993                |
|               |        |        |                      |        | 82 -> 86            | 0.39611                |
| 8:            | A      | 4.9991 | 248.01               | 0.0622 | 80 -> 83            | -0.13503               |

|     |   |        |        |        |          |          |
|-----|---|--------|--------|--------|----------|----------|
|     |   |        |        |        | 82 -> 85 | 0.20814  |
|     |   |        |        |        | 82 -> 87 | 0.31692  |
|     |   |        |        |        | 82 -> 88 | -0.14443 |
|     |   |        |        |        | 82 -> 89 | 0.34405  |
|     |   |        |        |        | 82 -> 90 | 0.20212  |
|     |   |        |        |        | 82 -> 92 | 0.10601  |
|     |   |        |        |        | 82 -> 93 | 0.16698  |
|     |   |        |        |        | 82 -> 98 | 0.10404  |
| 9:  | A | 5.3320 | 232.53 | 0.0089 | 80 -> 85 | 0.12021  |
|     |   |        |        |        | 82 -> 87 | 0.44714  |
|     |   |        |        |        | 82 -> 88 | 0.32791  |
|     |   |        |        |        | 82 -> 89 | -0.15223 |
|     |   |        |        |        | 82 -> 92 | -0.18329 |
|     |   |        |        |        | 82 -> 96 | 0.22105  |
| 10: | A | 5.4502 | 227.49 | 0.1756 | 79 -> 83 | 0.17963  |
|     |   |        |        |        | 80 -> 84 | 0.14928  |
|     |   |        |        |        | 80 -> 85 | -0.10154 |
|     |   |        |        |        | 82 -> 84 | 0.13795  |
|     |   |        |        |        | 82 -> 90 | 0.47696  |
|     |   |        |        |        | 82 -> 91 | -0.26730 |

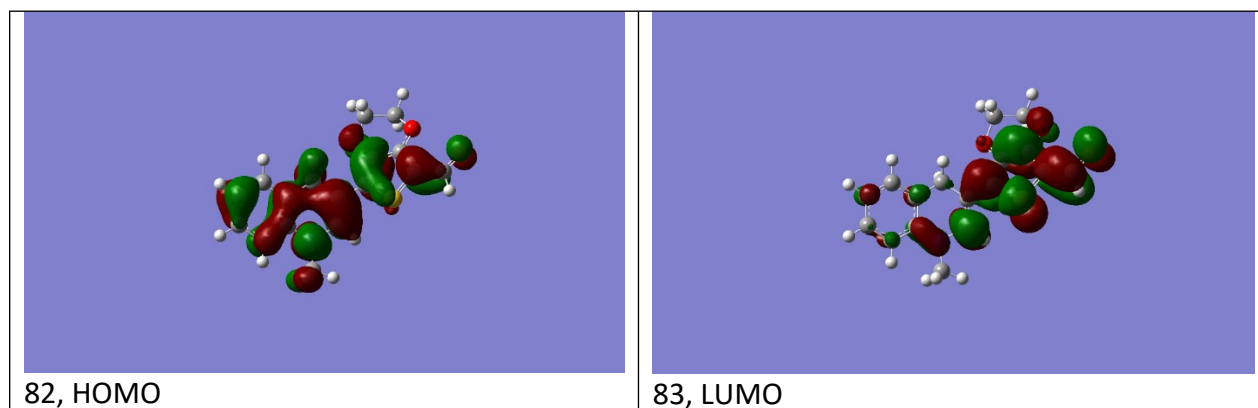

**Figure S32:** Drawings of selected molecular orbitals listed in Table S4.



## References

1. B. H. Dingle, R. B. Rumble, M. C. Brouwers and E. Canc Care Ontarios Program, *Can. J. Gastroenterol. Hepatol.*, 2005, **19**, 711-716.
2. S. Dent, H. Messersmith and M. Trudeau, *Breast Cancer Res. Treat.*, 2008, **108**, 319-331.
3. N. Silvestris, S. Cinieri, I. La Torre, G. Pezzella, G. Numico, L. Orlando and V. Lorusso, *Breast*, 2008, **17**, 220-226.
4. M. D. Shelley, G. Jones, A. Cleves, T. J. Wilt, M. D. Mason and H. G. Kynaston, *BJU Int.*, 2012, **109**, 496-505.
